# Supplementary material for: Comment on “Atmospheric oxidation reactions of imidazole initiated by hydroxyl radicals: kinetics and mechanism of reactions and atmospheric implications” by Safaei et al., Phys. Chem. Chem. Phys., 2019, 21, 8445
Source: Royal Society of Chemistry journal article supplement (doi:10.1039/c9cp02187f), 2019-01-01
Supplement: c9cp02187f1.pdf [file c9cp02187f1.pdf]

**Supplementary Information for**  
**Comment on “Atmospheric oxidation reactions of imidazole initiated by**  
**hydroxyl radicals: kinetics and mechanism of reactions and atmospheric**  
**implications” by Zahra Safaei, Abolfazl Shiroudi, Ehsan Zahedi and Mika**  
**Sillanpää, Phys. Chem. Chem. Phys., 2019, 21, 8445**

Tam V.-T. Mai,<sup>1,2,\*</sup> and Lam K. Huynh<sup>3,\*</sup>

<sup>1</sup> Molecular Science and Nano-Materials Lab, Institute for Computational Science and Technology, SBI Building, Quang Trung Software City, Tan Chanh Hiep Ward, District 12, Ho Chi Minh City, Vietnam.

<sup>2</sup> University of Science, Vietnam National University – HCMC, 227 Nguyen Van Cu, Ward 4, District 5, Ho Chi Minh City, Vietnam.

<sup>3</sup> International University, Vietnam National University – HCMC, Quarter 6, Linh Trung Ward, Thu Duc District, Ho Chi Minh City, Vietnam.

\*Corresponding authors.

## Contents

|                                                                                                                                                                                                                                                                                                                                                                                                    |    |
|----------------------------------------------------------------------------------------------------------------------------------------------------------------------------------------------------------------------------------------------------------------------------------------------------------------------------------------------------------------------------------------------------|----|
| <b>Table S1:</b> Optimized geometries, electronic energies at 0 K ( $E_{elec}^{0K}$ ), zero-point energy (ZPE) corrections and harmonic wavenumbers of the species involved with the lowest-energy conformer of a given species, calculated at M06-2X/aug-cc-pVTZ level of theory for the title reaction. ....                                                                                     | 3  |
| <b>Table S2:</b> Calculated overall rate constants, $k_{tot}$ , of the imidazole + OH $\rightarrow$ products over the range of temperature 297 – 440 K at different pressures, including the HIR treatments, Eckart quantum tunneling effects. Units are in $\text{cm}^3/\text{molecule}/\text{s}$ . ....                                                                                          | 13 |
| <b>Figure S1:</b> M06-2X/aug-cc-pVTZ optimized geometries for the species involved in the imidazole + OH reaction. All structures were obtained for the lowest-energy conformer of a given species. Bond lengths are in $\text{\AA}$ . ....                                                                                                                                                        | 16 |
| <b>Figure S2:</b> Time-resolved species profiles for the imidazole + OH reaction, simulated at the atmospheric condition using the stochastic (with $10^6$ numbers of trials) approach with $[\text{imidazole}]/[\text{Ar}] = 10^{-3}$ and $[\text{imidazole}]_0 \gg [\text{OH}]_0$ (Ar is the bath gas). The calculations were carried out using the simplified PES in Figure 2 (main text). .... | 16 |
| <b>Figure S3:</b> Hindrance potentials for the species involved in the imidazole + OH reaction, calculated at M06-2X/cc-pVDZ level of theory. ....                                                                                                                                                                                                                                                 | 23 |

**Table S1:** Optimized geometries, electronic energies at 0 K ( $E_{elec}^{0K}$ ), zero-point energy (ZPE) corrections and harmonic wavenumbers of the species involved with the lowest-energy conformer of a given species, calculated at M06-2X/aug-cc-pVTZ level of theory for the title reaction.

| Species                                     | Cartesian coordinate (Å) |             |             | $E_{elec}^{0K}$ (Hartree) | ZPE (Hartree) | Unscaled vibrational frequencies <sup>[a]</sup> (cm <sup>-1</sup> ) |                                                                                                                                                                                                                                                                                                                                                            |
|---------------------------------------------|--------------------------|-------------|-------------|---------------------------|---------------|---------------------------------------------------------------------|------------------------------------------------------------------------------------------------------------------------------------------------------------------------------------------------------------------------------------------------------------------------------------------------------------------------------------------------------------|
| <b>OH</b><br>(C <sub>∞v</sub> )             | 8                        | 0.00000000  | 0.00000000  | 0.10799900                | -75.733789    | 0.008530                                                            | 3742.0378 (3737.8) [1]                                                                                                                                                                                                                                                                                                                                     |
|                                             | 1                        | 0.00000000  | 0.00000000  | -0.86399500               |               |                                                                     |                                                                                                                                                                                                                                                                                                                                                            |
| <b>H<sub>2</sub>O</b><br>(C <sub>2v</sub> ) | 8                        | 0.00000000  | 0.00000000  | 0.11633200                | -76.4300922   | 0.021565                                                            | 1615.7190 3873.1681 3977.2474<br>(1595.0; 3657.0 [2]; 3756.0 [1])                                                                                                                                                                                                                                                                                          |
|                                             | 1                        | 0.00000000  | 0.76268000  | -0.46532600               |               |                                                                     |                                                                                                                                                                                                                                                                                                                                                            |
|                                             | 1                        | 0.00000000  | -0.76268000 | -0.46532600               |               |                                                                     |                                                                                                                                                                                                                                                                                                                                                            |
| <b>H</b><br>(D <sub>∞h</sub> )              | 1                        | 1.21619800  | -1.00826400 | 0.00000000                | -0.498207     | 0.00000                                                             | /                                                                                                                                                                                                                                                                                                                                                          |
| <b>Imidazole</b><br>(C <sub>s</sub> )       | 6                        | 0.99189500  | -0.52160000 | -0.00017800               | -226.212273   | 0.072087                                                            | 570.1515 655.6537 690.2652<br>768.9928 862.3679 909.8507<br>910.1665 949.0447 1087.7462<br>1105.7237 1153.7695 1186.5050<br>1291.5984 1390.1990 1451.8367<br>1525.8087 1585.7463 3272.6666<br>3279.1160 3306.9022 3688.5662<br>(539; 621; 663; 674; 758; 831; 898; 923; 988; 1013; 1062; 1098;<br>1188; 1265; 1328; 1404; 1448; 3110; 3123; 3143; 3517)[3] |
|                                             | 6                        | -1.12769300 | -0.29904500 | -0.00006500               |               |                                                                     |                                                                                                                                                                                                                                                                                                                                                            |
|                                             | 6                        | -0.62437000 | 0.96831500  | 0.00009000                |               |                                                                     |                                                                                                                                                                                                                                                                                                                                                            |
|                                             | 7                        | 0.73904900  | 0.81300500  | 0.00027600                |               |                                                                     |                                                                                                                                                                                                                                                                                                                                                            |
|                                             | 1                        | 1.42261800  | 1.54885100  | -0.00018000               |               |                                                                     |                                                                                                                                                                                                                                                                                                                                                            |
|                                             | 1                        | 1.99340300  | -0.91812500 | -0.00005200               |               |                                                                     |                                                                                                                                                                                                                                                                                                                                                            |
|                                             | 1                        | -2.16078900 | -0.60002600 | 0.00069400                |               |                                                                     |                                                                                                                                                                                                                                                                                                                                                            |
|                                             | 1                        | -1.09207900 | 1.93558200  | -0.00124100               |               |                                                                     |                                                                                                                                                                                                                                                                                                                                                            |
|                                             | 7                        | -0.11078400 | -1.22047600 | -0.00003300               |               |                                                                     |                                                                                                                                                                                                                                                                                                                                                            |
| <b>RC</b><br>(C <sub>1</sub> )              | 6                        | -0.34172000 | -1.02659500 | 0.00039300                | -301.959810   | 0.083475                                                            | 27.7239 49.7737 163.3562<br>564.4323 582.2844 649.9751<br>665.7123 704.3271 770.7221<br>868.1818 912.1842 923.9577<br>951.4751 1091.1359 1112.3555<br>1157.6952 1193.1697 1294.1036<br>1392.4034 1458.4002 1535.0027<br>1594.0495 3282.2318 3284.9411<br>3313.7299 3414.8382 3682.9096                                                                     |
|                                             | 6                        | -0.43006300 | 1.11132000  | 0.00033600                |               |                                                                     |                                                                                                                                                                                                                                                                                                                                                            |
|                                             | 6                        | -1.72325700 | 0.68421200  | -0.00043400               |               |                                                                     |                                                                                                                                                                                                                                                                                                                                                            |
|                                             | 7                        | -1.65189000 | -0.68646200 | -0.00038900               |               |                                                                     |                                                                                                                                                                                                                                                                                                                                                            |
|                                             | 1                        | -2.42875500 | -1.32364400 | -0.00085200               |               |                                                                     |                                                                                                                                                                                                                                                                                                                                                            |
|                                             | 1                        | -0.00435600 | -2.04913400 | 0.00060400                |               |                                                                     |                                                                                                                                                                                                                                                                                                                                                            |
|                                             | 1                        | -0.06226800 | 2.12210700  | 0.00055600                |               |                                                                     |                                                                                                                                                                                                                                                                                                                                                            |
|                                             | 1                        | -2.65938200 | 1.21096100  | -0.00100100               |               |                                                                     |                                                                                                                                                                                                                                                                                                                                                            |
|                                             | 7                        | 0.42181900  | 0.03488500  | 0.00085600                |               |                                                                     |                                                                                                                                                                                                                                                                                                                                                            |
|                                             | 8                        | 3.30253900  | -0.00568300 | -0.00056700               |               |                                                                     |                                                                                                                                                                                                                                                                                                                                                            |
|                                             | 1                        | 2.31518500  | 0.03259400  | 0.00019000                |               |                                                                     |                                                                                                                                                                                                                                                                                                                                                            |
| <b>Addition channels</b>                    |                          |             |             |                           |               |                                                                     |                                                                                                                                                                                                                                                                                                                                                            |

| Species                         | Cartesian coordinate<br>(Å) |              |              | $E_{elec}^{0K}$<br>(Hartree) | ZPE<br>(Hartree) | Unscaled vibrational frequencies <sup>[a]</sup> (cm <sup>-1</sup> ) |           |           |           |
|---------------------------------|-----------------------------|--------------|--------------|------------------------------|------------------|---------------------------------------------------------------------|-----------|-----------|-----------|
| <b>TS1</b><br>(C <sub>1</sub> ) | 6                           | 0.449183000  | 0.068890000  | 0.778685000                  | -301.951405      | 0.083283                                                            | -442.7900 | 143.8862  | 155.9370  |
|                                 | 6                           | -1.183757000 | -0.818475000 | -0.281396000                 |                  |                                                                     | 261.7786  | 581.4107  | 617.5111  |
|                                 | 6                           | -1.318494000 | 0.544442000  | -0.436791000                 |                  |                                                                     | 650.6518  | 716.4407  | 788.6317  |
|                                 | 7                           | -0.302689000 | 1.092908000  | 0.276252000                  |                  |                                                                     | 866.8406  | 907.2479  | 914.3586  |
|                                 | 1                           | -0.044201000 | 2.063977000  | 0.293289000                  |                  |                                                                     | 943.9409  | 1086.4518 | 1112.3499 |
|                                 | 1                           | 1.214036000  | 0.225880000  | 1.517267000                  |                  |                                                                     | 1139.8109 | 1220.7718 | 1264.3800 |
|                                 | 1                           | -1.812168000 | -1.590234000 | -0.691540000                 |                  |                                                                     | 1353.0264 | 1421.7157 | 1510.8125 |
|                                 | 1                           | -2.027656000 | 1.138371000  | -0.984206000                 |                  |                                                                     | 1539.6449 | 3273.5671 | 3294.7634 |
|                                 | 7                           | -0.111707000 | -1.104055000 | 0.491391000                  |                  |                                                                     | 3304.1177 | 3682.7795 | 3804.0832 |
|                                 | 8                           | 1.994986000  | 0.047131000  | -0.634695000                 |                  |                                                                     |           |           |           |
| 1                               | 1.929281000                 | -0.906160000 | -0.793740000 |                              |                  |                                                                     |           |           |           |
| <b>TS2</b><br>(C <sub>1</sub> ) | 6                           | 1.202696000  | -0.713535000 | -0.291502000                 | -301.947967      | 0.083421                                                            | -424.7340 | 156.5320  | 161.4007  |
|                                 | 6                           | -0.532433000 | -0.058146000 | 0.778008000                  |                  |                                                                     | 227.8314  | 553.3099  | 595.6916  |
|                                 | 6                           | 0.146043000  | 1.093167000  | 0.379666000                  |                  |                                                                     | 661.7717  | 767.5356  | 821.2313  |
|                                 | 7                           | 1.219101000  | 0.656329000  | -0.324491000                 |                  |                                                                     | 875.5081  | 900.2722  | 936.2628  |
|                                 | 1                           | 1.877414000  | 1.230318000  | -0.821687000                 |                  |                                                                     | 941.5155  | 1071.2117 | 1097.7393 |
|                                 | 1                           | 1.961736000  | -1.302112000 | -0.779966000                 |                  |                                                                     | 1136.3143 | 1158.5841 | 1291.0282 |
|                                 | 1                           | -1.292094000 | -0.130475000 | 1.533777000                  |                  |                                                                     | 1381.7081 | 1438.7126 | 1491.9378 |
|                                 | 1                           | -0.105613000 | 2.132665000  | 0.477976000                  |                  |                                                                     | 1582.5447 | 3270.5304 | 3292.2473 |
|                                 | 7                           | 0.199493000  | -1.173198000 | 0.388918000                  |                  |                                                                     | 3312.2982 | 3680.6377 | 3813.1188 |
|                                 | 8                           | -1.935110000 | 0.074615000  | -0.641397000                 |                  |                                                                     |           |           |           |
| 1                               | -1.788556000                | -0.838148000 | -0.926946000 |                              |                  |                                                                     |           |           |           |
| <b>TS3</b><br>(C <sub>1</sub> ) | 6                           | -1.340225000 | -0.415590000 | -0.447051000                 | -301.953424      | 0.083182                                                            | -293.6567 | 127.9530  | 130.4954  |
|                                 | 6                           | -0.107973000 | 1.062062000  | 0.456445000                  |                  |                                                                     | 205.7824  | 572.1014  | 610.7690  |
|                                 | 6                           | 0.441996000  | -0.161775000 | 0.813182000                  |                  |                                                                     | 666.7836  | 696.6670  | 841.3414  |
|                                 | 7                           | -0.404490000 | -1.088884000 | 0.264312000                  |                  |                                                                     | 867.7178  | 901.2285  | 908.9851  |
|                                 | 1                           | -0.259788000 | -2.083255000 | 0.265911000                  |                  |                                                                     | 948.1575  | 1084.9843 | 1102.9637 |
|                                 | 1                           | -2.103953000 | -0.917214000 | -1.017488000                 |                  |                                                                     | 1149.8118 | 1202.3980 | 1288.5681 |
|                                 | 1                           | 0.254651000  | 2.039859000  | 0.723251000                  |                  |                                                                     | 1357.1944 | 1426.9058 | 1507.6938 |
|                                 | 1                           | 1.197278000  | -0.421442000 | 1.529219000                  |                  |                                                                     | 1552.9041 | 3273.9711 | 3279.2812 |
|                                 | 7                           | -1.193358000 | 0.884874000  | -0.343925000                 |                  |                                                                     | 3320.3477 | 3684.7559 | 3802.8287 |
|                                 | 8                           | 2.052236000  | -0.086903000 | -0.586840000                 |                  |                                                                     |           |           |           |
| 1                               | 1.716072000                 | 0.597169000  | -1.184332000 |                              |                  |                                                                     |           |           |           |
| <b>IM1</b>                      | 6                           | 0.728704000  | -0.017358000 | 0.446380000                  | -301.995581      | 0.085842                                                            | 129.1930  | 222.6640  | 310.7978  |

| Species                  | Cartesian coordinate<br>(Å) |              |              | $E_{elec}^{0K}$<br>(Hartree) | ZPE<br>(Hartree) | Unscaled vibrational frequencies <sup>[a]</sup> (cm <sup>-1</sup> ) |           |           |           |
|--------------------------|-----------------------------|--------------|--------------|------------------------------|------------------|---------------------------------------------------------------------|-----------|-----------|-----------|
| (C <sub>1</sub> )        | 6                           | -1.274870000 | -0.770904000 | -0.138685000                 |                  |                                                                     | 438.9893  | 556.4630  | 605.4417  |
|                          | 6                           | -1.371637000 | 0.628230000  | -0.205535000                 |                  |                                                                     | 703.4831  | 811.1898  | 872.6772  |
|                          | 7                           | -0.178920000 | 1.114911000  | 0.203558000                  |                  |                                                                     | 918.7739  | 958.5380  | 1011.2295 |
|                          | 1                           | 0.153850000  | 2.050946000  | 0.051656000                  |                  |                                                                     | 1080.3666 | 1092.7747 | 1156.7321 |
|                          | 1                           | 1.118417000  | 0.031238000  | 1.465272000                  |                  |                                                                     | 1242.9464 | 1301.3748 | 1306.0026 |
|                          | 1                           | -2.070038000 | -1.461887000 | -0.376480000                 |                  |                                                                     | 1408.2341 | 1440.9812 | 1474.9430 |
|                          | 1                           | -2.193556000 | 1.254019000  | -0.505959000                 |                  |                                                                     | 1521.2047 | 3075.9441 | 3235.4717 |
|                          | 7                           | -0.089995000 | -1.188131000 | 0.244731000                  |                  |                                                                     | 3285.9659 | 3675.3258 | 3842.6288 |
|                          | 8                           | 1.844352000  | 0.013810000  | -0.400934000                 |                  |                                                                     |           |           |           |
|                          | 1                           | 1.625727000  | -0.512058000 | -1.178007000                 |                  |                                                                     |           |           |           |
| IM2<br>(C <sub>1</sub> ) | 6                           | -1.443910000 | -1.303623000 | -0.735797000                 | -301.978996      | 0.085185                                                            | 140.3318  | 261.2880  | 329.4712  |
|                          | 1                           | -1.523539000 | -2.112049000 | -0.008989000                 |                  |                                                                     | 362.4059  | 446.8638  | 519.8841  |
|                          | 1                           | -2.022153000 | -1.542452000 | -1.628902000                 |                  |                                                                     | 614.3735  | 798.6812  | 880.8039  |
|                          | 6                           | -0.014917000 | -0.903727000 | -1.047932000                 |                  |                                                                     | 908.2420  | 942.5778  | 1017.0983 |
|                          | 1                           | 0.008512000  | -0.222671000 | -1.903088000                 |                  |                                                                     | 1073.0264 | 1111.2017 | 1135.2959 |
|                          | 1                           | 0.537283000  | -1.797015000 | -1.366088000                 |                  |                                                                     | 1253.5175 | 1277.3243 | 1312.1700 |
|                          | 6                           | 0.777307000  | -0.279778000 | 0.116596000                  |                  |                                                                     | 1394.5793 | 1421.1071 | 1447.6038 |
|                          | 6                           | 0.260408000  | 2.043588000  | -0.417337000                 |                  |                                                                     | 1661.4651 | 3036.7871 | 3224.9656 |
|                          | 1                           | -0.308457000 | 1.818734000  | -1.324822000                 |                  |                                                                     | 3293.0285 | 3685.4617 | 3842.1325 |
|                          | 1                           | -0.203140000 | 2.899817000  | 0.071793000                  |                  |                                                                     |           |           |           |
|                          | 1                           | 1.288922000  | 2.305407000  | -0.681515000                 |                  |                                                                     |           |           |           |
|                          | 1                           | -2.056067000 | -0.405891000 | -0.241099000                 |                  |                                                                     |           |           |           |
|                          | 8                           | 0.213015000  | 0.981912000  | 0.515737000                  |                  |                                                                     |           |           |           |
|                          | 6                           | 0.682343000  | -1.133841000 | 1.374916000                  |                  |                                                                     |           |           |           |
|                          | 1                           | 1.336314000  | -0.726382000 | 2.147928000                  |                  |                                                                     |           |           |           |
|                          | 1                           | -0.339401000 | -1.137045000 | 1.758656000                  |                  |                                                                     |           |           |           |
|                          | 1                           | 0.983382000  | -2.162836000 | 1.163689000                  |                  |                                                                     |           |           |           |
|                          | 6                           | 2.240208000  | -0.105874000 | -0.292087000                 |                  |                                                                     |           |           |           |
|                          | 1                           | 2.720734000  | -1.083939000 | -0.361480000                 |                  |                                                                     |           |           |           |
|                          | 1                           | 2.340655000  | 0.382516000  | -1.264060000                 |                  |                                                                     |           |           |           |
| 1                        | 2.768944000                 | 0.486476000  | 0.458199000  |                              |                  |                                                                     |           |           |           |
| 8                        | -2.568481000                | 0.584379000  | 0.525240000  |                              |                  |                                                                     |           |           |           |
| 1                        | -1.696899000                | 0.866528000  | 0.861809000  |                              |                  |                                                                     |           |           |           |
| IM3                      | 6                           | -1.362634000 | -0.576320000 | -0.202586000                 | -301.990918      | 0.085373                                                            | 111.8891  | 303.8544  | 340.0462  |

| Species                             | Cartesian coordinate<br>(Å) |              |              | $E_{elec}^{0K}$<br>(Hartree) | ZPE<br>(Hartree) | Unscaled vibrational frequencies <sup>[a]</sup> (cm <sup>-1</sup> ) |            |           |           |
|-------------------------------------|-----------------------------|--------------|--------------|------------------------------|------------------|---------------------------------------------------------------------|------------|-----------|-----------|
| (C <sub>1</sub> )                   | 6                           | -0.190484000 | 1.151722000  | 0.214111000                  |                  |                                                                     | 429.2277   | 540.0630  | 599.0506  |
|                                     | 6                           | 0.753659000  | 0.006714000  | 0.457437000                  |                  |                                                                     | 635.7587   | 806.1415  | 822.6098  |
|                                     | 7                           | -0.179012000 | -1.083857000 | 0.233736000                  |                  |                                                                     | 893.6490   | 935.4359  | 1042.1312 |
|                                     | 1                           | 0.092148000  | -2.049937000 | 0.207283000                  |                  |                                                                     | 1046.5429  | 1122.7825 | 1185.8826 |
|                                     | 1                           | -2.185094000 | -1.205525000 | -0.501296000                 |                  |                                                                     | 1233.9762  | 1251.6076 | 1302.0933 |
|                                     | 1                           | 0.065830000  | 2.191635000  | 0.331263000                  |                  |                                                                     | 1323.5370  | 1419.1947 | 1471.1579 |
|                                     | 1                           | 1.183442000  | -0.032947000 | 1.460258000                  |                  |                                                                     | 1532.9465  | 3072.9383 | 3257.1357 |
|                                     | 7                           | -1.393497000 | 0.743090000  | -0.208128000                 |                  |                                                                     | 3266.1203  | 3693.7479 | 3834.8887 |
|                                     | 8                           | 1.881627000  | -0.030252000 | -0.400976000                 |                  |                                                                     |            |           |           |
|                                     | 1                           | 1.594975000  | 0.231470000  | -1.282729000                 |                  |                                                                     |            |           |           |
| <b>TS-IM1a</b><br>(C <sub>1</sub> ) | 6                           | 0.644447000  | -0.038719000 | 0.082155000                  | -301.939203      | 0.078751                                                            | -1054.2256 | 278.2412  | 311.2573  |
|                                     | 6                           | -1.360404000 | -0.750048000 | -0.045324000                 |                  |                                                                     | 413.3013   | 504.1168  | 566.4830  |
|                                     | 6                           | -1.447726000 | 0.614169000  | -0.042261000                 |                  |                                                                     | 594.9989   | 646.5838  | 728.7360  |
|                                     | 7                           | -0.151322000 | 1.067918000  | -0.034980000                 |                  |                                                                     | 762.1572   | 809.7743  | 905.8808  |
|                                     | 1                           | 0.165140000  | 2.016973000  | 0.059659000                  |                  |                                                                     | 928.9285   | 1008.3741 | 1100.7872 |
|                                     | 1                           | 0.650687000  | -0.078846000 | 1.790991000                  |                  |                                                                     | 1142.9257  | 1154.9237 | 1229.3117 |
|                                     | 1                           | -2.170163000 | -1.458358000 | -0.065215000                 |                  |                                                                     | 1329.7931  | 1399.9548 | 1520.0361 |
|                                     | 1                           | -2.289811000 | 1.281206000  | -0.044058000                 |                  |                                                                     | 1528.0083  | 1579.3892 | 3278.5094 |
|                                     | 7                           | -0.057081000 | -1.156852000 | -0.028922000                 |                  |                                                                     | 3307.1288  | 3682.8852 | 3855.0298 |
|                                     | 8                           | 1.967193000  | 0.088184000  | -0.144741000                 |                  |                                                                     |            |           |           |
| 1                                   | 2.347525000                 | -0.796319000 | -0.103552000 |                              |                  |                                                                     |            |           |           |
| <b>TS-IM1b</b><br>(C <sub>1</sub> ) | 6                           | 0.658891000  | -0.117227000 | 0.412257000                  | -301.900400      | 0.076950                                                            | -747.2610  | 180.2814  | 240.5513  |
|                                     | 6                           | -1.350352000 | -0.714850000 | -0.189929000                 |                  |                                                                     | 306.6913   | 440.3886  | 458.9173  |
|                                     | 6                           | -1.298539000 | 0.759682000  | -0.039423000                 |                  |                                                                     | 599.3855   | 630.6665  | 805.4009  |
|                                     | 7                           | -0.111889000 | 1.133209000  | 0.248880000                  |                  |                                                                     | 864.7160   | 875.2766  | 958.4460  |
|                                     | 1                           | 0.792162000  | 1.999317000  | -1.126554000                 |                  |                                                                     | 968.8570   | 995.9030  | 1020.0356 |
|                                     | 1                           | 0.827831000  | -0.226607000 | 1.487568000                  |                  |                                                                     | 1196.5693  | 1247.3376 | 1295.1087 |
|                                     | 1                           | -2.224416000 | -1.299393000 | -0.448620000                 |                  |                                                                     | 1311.7941  | 1347.9901 | 1414.3051 |
|                                     | 1                           | -2.117106000 | 1.453847000  | -0.177412000                 |                  |                                                                     | 1588.7443  | 1699.4018 | 3078.5475 |
|                                     | 7                           | -0.208354000 | -1.231679000 | 0.017455000                  |                  |                                                                     | 3203.5004  | 3217.6156 | 3830.9152 |
|                                     | 8                           | 1.891012000  | -0.108542000 | -0.195077000                 |                  |                                                                     |            |           |           |
| 1                                   | 1.775133000                 | 0.064835000  | -1.136142000 |                              |                  |                                                                     |            |           |           |
| <b>TS-IM2a</b><br>(C <sub>1</sub> ) | 6                           | 1.273859000  | -0.792610000 | -0.036631000                 | -301.932920      | 0.078760                                                            | -1096.1964 | 219.1447  | 300.9284  |
|                                     | 6                           | -0.683541000 | 0.044032000  | 0.082530000                  |                  |                                                                     | 417.3443   | 544.0547  | 567.5351  |

| Species                             | Cartesian coordinate<br>(Å) |              |              | $E_{elec}^{0K}$<br>(Hartree) | ZPE<br>(Hartree) | Unscaled vibrational frequencies <sup>[a]</sup> (cm <sup>-1</sup> ) |           |           |           |
|-------------------------------------|-----------------------------|--------------|--------------|------------------------------|------------------|---------------------------------------------------------------------|-----------|-----------|-----------|
|                                     | 6                           | 0.182242000  | 1.126516000  | -0.041006000                 |                  |                                                                     | 614.5620  | 642.9880  | 695.3685  |
|                                     | 7                           | 1.429670000  | 0.557323000  | -0.033842000                 |                  |                                                                     | 751.0892  | 828.1037  | 879.8580  |
|                                     | 1                           | 2.304807000  | 1.050417000  | -0.037892000                 |                  |                                                                     | 938.6511  | 998.2925  | 1088.7654 |
|                                     | 1                           | 2.115664000  | -1.464531000 | -0.059666000                 |                  |                                                                     | 1134.5010 | 1174.5285 | 1279.0542 |
|                                     | 1                           | -0.713196000 | 0.073614000  | 1.736414000                  |                  |                                                                     | 1333.8404 | 1400.1362 | 1474.5905 |
|                                     | 1                           | 0.008804000  | 2.184541000  | -0.003203000                 |                  |                                                                     | 1550.2022 | 1600.6899 | 3270.2745 |
|                                     | 7                           | 0.020822000  | -1.142970000 | -0.027851000                 |                  |                                                                     | 3320.9095 | 3689.1086 | 3857.2995 |
|                                     | 8                           | -2.015034000 | 0.093916000  | -0.163220000                 |                  |                                                                     |           |           |           |
|                                     | 1                           | -2.384617000 | -0.763471000 | 0.072597000                  |                  |                                                                     |           |           |           |
| <b>TS-IM2b</b><br>(C <sub>1</sub> ) | 6                           | -1.189888000 | -0.803674000 | 0.061413000                  | -301.895552      | 0.076558                                                            | -847.7798 | 169.2166  | 213.9651  |
|                                     | 6                           | 0.765488000  | 0.013552000  | -0.392433000                 |                  |                                                                     | 309.5219  | 376.9409  | 385.0023  |
|                                     | 6                           | -0.253378000 | 1.108484000  | -0.208510000                 |                  |                                                                     | 582.0475  | 626.0554  | 786.7280  |
|                                     | 7                           | -1.415781000 | 0.619301000  | 0.013880000                  |                  |                                                                     | 866.6145  | 901.5601  | 955.0518  |
|                                     | 1                           | -2.288275000 | 0.771179000  | 1.560338000                  |                  |                                                                     | 997.0154  | 1010.2279 | 1052.8091 |
|                                     | 1                           | -2.031348000 | -1.451227000 | 0.267724000                  |                  |                                                                     | 1188.3671 | 1211.2097 | 1283.1247 |
|                                     | 1                           | 1.060518000  | -0.016158000 | -1.451518000                 |                  |                                                                     | 1309.9285 | 1327.3016 | 1424.3916 |
|                                     | 1                           | -0.061274000 | 2.169263000  | -0.289277000                 |                  |                                                                     | 1594.6890 | 1705.8855 | 3001.4816 |
|                                     | 7                           | -0.004532000 | -1.200243000 | -0.134961000                 |                  |                                                                     | 3228.6795 | 3233.2796 | 3863.7923 |
|                                     | 8                           | 1.870179000  | 0.167431000  | 0.445154000                  |                  |                                                                     |           |           |           |
|                                     | 1                           | 2.367811000  | -0.656082000 | 0.436254000                  |                  |                                                                     |           |           |           |
| <b>TS-IM3a</b><br>(C <sub>1</sub> ) | 6                           | -1.427182000 | -0.604596000 | -0.010842000                 | -301.931486      | 0.078349                                                            | -775.5985 | 206.5242  | 296.8942  |
|                                     | 6                           | -0.203025000 | 1.140451000  | -0.053090000                 |                  |                                                                     | 387.1452  | 480.2467  | 572.0693  |
|                                     | 6                           | 0.666493000  | 0.063654000  | 0.036160000                  |                  |                                                                     | 594.1709  | 674.8900  | 676.4637  |
|                                     | 7                           | -0.146270000 | -1.048482000 | -0.021074000                 |                  |                                                                     | 741.6812  | 851.0213  | 877.0916  |
|                                     | 1                           | 0.176206000  | -1.999236000 | 0.034470000                  |                  |                                                                     | 925.8094  | 1029.1367 | 1110.5387 |
|                                     | 1                           | -2.271336000 | -1.273331000 | 0.001386000                  |                  |                                                                     | 1166.4001 | 1225.6018 | 1271.0578 |
|                                     | 1                           | 0.060338000  | 2.183777000  | -0.069789000                 |                  |                                                                     | 1318.4385 | 1394.6486 | 1424.7131 |
|                                     | 1                           | 0.825622000  | 0.223464000  | 1.803013000                  |                  |                                                                     | 1513.8843 | 1603.0290 | 3273.0678 |
|                                     | 7                           | -1.490913000 | 0.704984000  | -0.032796000                 |                  |                                                                     | 3282.5212 | 3676.8264 | 3817.5175 |
|                                     | 8                           | 1.995285000  | -0.050575000 | -0.226944000                 |                  |                                                                     |           |           |           |
|                                     | 1                           | 2.489460000  | 0.077366000  | 0.590193000                  |                  |                                                                     |           |           |           |
| <b>TS-IM3b</b><br>(C <sub>1</sub> ) | 6                           | -1.297384000 | -0.707917000 | -0.031624000                 | -301.896932      | 0.076854                                                            | -772.7133 | 164.8947  | 247.4538  |
|                                     | 6                           | -0.300350000 | 1.174464000  | -0.016182000                 |                  |                                                                     | 313.2266  | 391.3494  | 534.0513  |
|                                     | 6                           | 0.676993000  | 0.101385000  | 0.409130000                  |                  |                                                                     | 587.3501  | 609.6689  | 767.4236  |

| Species                            | Cartesian coordinate<br>(Å) |              |              | $E_{elec}^{0K}$<br>(Hartree) | ZPE<br>(Hartree) | Unscaled vibrational frequencies <sup>[a]</sup> (cm <sup>-1</sup> ) |           |           |           |
|------------------------------------|-----------------------------|--------------|--------------|------------------------------|------------------|---------------------------------------------------------------------|-----------|-----------|-----------|
|                                    | 7                           | -0.119538000 | -1.121963000 | 0.251656000                  |                  |                                                                     | 867.5587  | 898.1283  | 964.4561  |
|                                    | 1                           | 0.708081000  | -1.924638000 | -1.138402000                 |                  |                                                                     | 982.9616  | 1022.6721 | 1069.6307 |
|                                    | 1                           | -2.144714000 | -1.365021000 | -0.165337000                 |                  |                                                                     | 1181.9993 | 1248.1515 | 1270.6196 |
|                                    | 1                           | -0.073313000 | 2.231221000  | -0.078467000                 |                  |                                                                     | 1330.9526 | 1335.1610 | 1407.9179 |
|                                    | 1                           | 0.834040000  | 0.224973000  | 1.488217000                  |                  |                                                                     | 1556.7794 | 1683.7977 | 3038.5705 |
|                                    | 7                           | -1.465779000 | 0.696146000  | -0.218109000                 |                  |                                                                     | 3216.4082 | 3237.0682 | 3806.7097 |
|                                    | 8                           | 1.930749000  | 0.088922000  | -0.181273000                 |                  |                                                                     |           |           |           |
|                                    | 1                           | 1.851579000  | -0.304786000 | -1.058598000                 |                  |                                                                     |           |           |           |
| <b>P-IM1a</b><br>(C <sub>1</sub> ) | 6                           | -0.648687000 | -0.043463000 | -0.000212000                 | -301.4516126     | 0.07668                                                             | 305.4508  | 388.5728  | 432.6472  |
|                                    | 6                           | 1.352168000  | -0.745770000 | -0.000283000                 |                  |                                                                     | 519.2337  | 647.0505  | 722.4406  |
|                                    | 6                           | 1.441972000  | 0.607749000  | -0.000044000                 |                  |                                                                     | 723.3575  | 763.7087  | 896.8881  |
|                                    | 7                           | 0.130282000  | 1.058986000  | 0.000081000                  |                  |                                                                     | 931.5230  | 1023.4509 | 1085.9816 |
|                                    | 1                           | -0.195703000 | 2.008811000  | 0.001306000                  |                  |                                                                     | 1147.5405 | 1163.1489 | 1230.7696 |
|                                    | 1                           | 2.153855000  | -1.462647000 | -0.000034000                 |                  |                                                                     | 1324.4494 | 1394.0675 | 1568.9186 |
|                                    | 1                           | 2.278159000  | 1.281428000  | -0.000115000                 |                  |                                                                     | 1585.2269 | 1656.3296 | 3284.2272 |
|                                    | 7                           | 0.028247000  | -1.149225000 | 0.000407000                  |                  |                                                                     | 3312.2275 | 3692.1458 | 3859.1644 |
|                                    | 8                           | -1.983256000 | 0.086957000  | -0.000294000                 |                  |                                                                     |           |           |           |
|                                    | 1                           | -2.352690000 | -0.802667000 | 0.001012000                  |                  |                                                                     |           |           |           |
| <b>P-IM1b</b><br>(C <sub>1</sub> ) | 6                           | 0.681923000  | 0.000072000  | 0.396468000                  | -301.40619       | 0.075444                                                            | 207.1895  | 210.2857  | 434.5146  |
|                                    | 6                           | -1.296670000 | -0.746904000 | -0.133417000                 |                  |                                                                     | 605.8986  | 627.4426  | 809.3027  |
|                                    | 6                           | -1.296794000 | 0.746755000  | -0.133436000                 |                  |                                                                     | 874.9898  | 875.7376  | 950.5563  |
|                                    | 7                           | -0.139406000 | 1.190638000  | 0.131897000                  |                  |                                                                     | 975.9096  | 1004.0613 | 1020.6148 |
|                                    | 1                           | 0.902664000  | 0.000229000  | 1.467102000                  |                  |                                                                     | 1186.4797 | 1250.5318 | 1299.9104 |
|                                    | 1                           | -2.144124000 | -1.388865000 | -0.340510000                 |                  |                                                                     | 1303.2427 | 1345.4085 | 1412.0476 |
|                                    | 1                           | -2.144375000 | 1.388525000  | -0.340612000                 |                  |                                                                     | 1650.2052 | 1726.9111 | 3086.0481 |
|                                    | 7                           | -0.139222000 | -1.190555000 | 0.132073000                  |                  |                                                                     | 3196.7006 | 3208.4093 | 3853.4995 |
|                                    | 8                           | 1.886328000  | 0.000114000  | -0.273806000                 |                  |                                                                     |           |           |           |
|                                    | 1                           | 1.714846000  | -0.000925000 | -1.221012000                 |                  |                                                                     |           |           |           |
| <b>P-IM2a</b><br>(C <sub>1</sub> ) | 6                           | 1.256738000  | -0.793683000 | -0.000007000                 | -301.44691       | 0.076638                                                            | 326.2778  | 337.9995  | 425.7654  |
|                                    | 6                           | -0.687842000 | 0.057986000  | 0.000006000                  |                  |                                                                     | 546.9002  | 661.9456  | 695.9976  |
|                                    | 6                           | 0.165722000  | 1.122835000  | -0.000064000                 |                  |                                                                     | 706.2619  | 762.9977  | 854.6757  |
|                                    | 7                           | 1.420688000  | 0.544610000  | 0.000028000                  |                  |                                                                     | 951.0476  | 1016.5282 | 1086.5264 |
|                                    | 1                           | 2.297134000  | 1.034491000  | 0.000029000                  |                  |                                                                     | 1154.2919 | 1183.2539 | 1282.0905 |
|                                    | 1                           | 2.084373000  | -1.482053000 | -0.000050000                 |                  |                                                                     | 1344.9452 | 1416.5528 | 1496.9795 |



| Species                            | Cartesian coordinate (Å) |              |              | $E_{elec}^{0K}$ (Hartree) | ZPE (Hartree) | Unscaled vibrational frequencies <sup>[a]</sup> (cm <sup>-1</sup> ) |            |           |           |
|------------------------------------|--------------------------|--------------|--------------|---------------------------|---------------|---------------------------------------------------------------------|------------|-----------|-----------|
|                                    | 1                        | 0.004165000  | 2.183175000  | 0.000098000               |               |                                                                     | 1548.8267  | 1682.3561 | 3279.4832 |
|                                    | 7                        | -0.014233000 | -1.122148000 | 0.000009000               |               |                                                                     | 3322.4835  | 3694.3488 | 3861.6900 |
|                                    | 8                        | -2.036541000 | 0.099544000  | 0.000012000               |               |                                                                     |            |           |           |
|                                    | 1                        | -2.346238000 | -0.812023000 | -0.000043000              |               |                                                                     |            |           |           |
| <b>P-IM2b</b><br>(C <sub>1</sub> ) | 6                        | 1.280540000  | -0.710668000 | -0.121806000              | -301.403099   | 0.075270                                                            | 188.9474   | 216.3889  | 378.2622  |
|                                    | 6                        | -0.696387000 | 0.000233000  | 0.402211000               |               |                                                                     | 585.6328   | 612.0483  | 781.6698  |
|                                    | 6                        | 0.249831000  | 1.142014000  | 0.087740000               |               |                                                                     | 867.0722   | 903.5962  | 973.2147  |
|                                    | 7                        | 1.420431000  | 0.722424000  | -0.181530000              |               |                                                                     | 1003.1187  | 1010.8345 | 1062.8536 |
|                                    | 1                        | 2.146766000  | -1.325582000 | -0.325104000              |               |                                                                     | 1167.3758  | 1253.4305 | 1268.5265 |
|                                    | 1                        | -0.920361000 | 0.028109000  | 1.474483000               |               |                                                                     | 1324.6196  | 1334.1572 | 1404.5617 |
|                                    | 1                        | -0.009292000 | 2.192900000  | 0.126511000               |               |                                                                     | 1629.8956  | 1718.8485 | 3053.7355 |
|                                    | 7                        | 0.134103000  | -1.175122000 | 0.158665000               |               |                                                                     | 3211.4538  | 3229.1990 | 3860.4828 |
|                                    | 8                        | -1.917018000 | -0.002558000 | -0.268964000              |               |                                                                     |            |           |           |
|                                    | 1                        | -1.766602000 | -0.295547000 | -1.172992000              |               |                                                                     |            |           |           |
| <b>P-IM3a</b><br>(C <sub>1</sub> ) | 6                        | 1.425217000  | -0.576113000 | 0.000232000               | -301.438901   | 0.076136                                                            | 192.9605   | 311.8828  | 405.9579  |
|                                    | 6                        | 0.145961000  | 1.141172000  | -0.000399000              |               |                                                                     | 537.0737   | 681.3832  | 687.0977  |
|                                    | 6                        | -0.673200000 | 0.052132000  | -0.000318000              |               |                                                                     | 696.4866   | 812.7147  | 833.2987  |
|                                    | 7                        | 0.137307000  | -1.043121000 | 0.000272000               |               |                                                                     | 932.6502   | 1044.9155 | 1098.6332 |
|                                    | 1                        | -0.175980000 | -1.998286000 | 0.001143000               |               |                                                                     | 1141.6777  | 1172.5698 | 1287.7118 |
|                                    | 1                        | 2.274131000  | -1.238252000 | 0.000221000               |               |                                                                     | 1302.0943  | 1411.6721 | 1516.5953 |
|                                    | 1                        | -0.126655000 | 2.182195000  | -0.000985000              |               |                                                                     | 1560.5852  | 1663.3663 | 3274.5823 |
|                                    | 7                        | 1.460365000  | 0.722338000  | 0.000110000               |               |                                                                     | 3278.5877  | 3680.7827 | 3894.5210 |
|                                    | 8                        | -2.011386000 | -0.139614000 | -0.001446000              |               |                                                                     |            |           |           |
|                                    | 1                        | -2.451988000 | 0.713593000  | 0.011421000               |               |                                                                     |            |           |           |
| <b>Abstraction channels</b>        |                          |              |              |                           |               |                                                                     |            |           |           |
| <b>TS4</b><br>(C <sub>1</sub> )    | 6                        | -0.382513000 | -0.122792000 | -0.133936000              | -301.933082   | 0.077070                                                            | -1690.9155 | 56.2313   | 109.0769  |
|                                    | 6                        | 1.648187000  | -0.686905000 | 0.051358000               |               |                                                                     | 173.8397   | 376.3936  | 553.8201  |
|                                    | 6                        | 1.638530000  | 0.676214000  | 0.072601000               |               |                                                                     | 645.5926   | 649.9671  | 759.7761  |
|                                    | 7                        | 0.312996000  | 1.033507000  | -0.034420000              |               |                                                                     | 777.8738   | 880.2111  | 898.9137  |
|                                    | 1                        | -0.071679000 | 1.961352000  | -0.062107000              |               |                                                                     | 957.0491   | 1019.3392 | 1089.8823 |
|                                    | 1                        | -1.623457000 | -0.086286000 | -0.255431000              |               |                                                                     | 1128.0263  | 1167.9615 | 1243.4591 |
|                                    | 1                        | 2.493020000  | -1.349774000 | 0.113306000               |               |                                                                     | 1330.7739  | 1381.1741 | 1442.3933 |
|                                    | 1                        | 2.425047000  | 1.404797000  | 0.146432000               |               |                                                                     | 1523.8662  | 1587.9035 | 3281.6905 |
|                                    | 7                        | 0.359914000  | -1.170976000 | -0.065353000              |               |                                                                     | 3305.8139  | 3685.2190 | 3803.6917 |

| Species                         | Cartesian coordinate<br>(Å) |              |              | $E_{elec}^{0K}$<br>(Hartree) | ZPE<br>(Hartree) | Unscaled vibrational frequencies <sup>[a]</sup> (cm <sup>-1</sup> ) |            |           |           |
|---------------------------------|-----------------------------|--------------|--------------|------------------------------|------------------|---------------------------------------------------------------------|------------|-----------|-----------|
|                                 | 8                           | -2.809919000 | 0.048949000  | 0.007106000                  |                  |                                                                     |            |           |           |
|                                 | 1                           | -2.879172000 | -0.558502000 | 0.759228000                  |                  |                                                                     |            |           |           |
| <b>TS5</b><br>(C <sub>s</sub> ) | 6                           | 1.426638000  | -0.863941000 | 0.000067000                  | -301.933432      | 0.077255                                                            | -1646.3744 | 92.3011   | 94.1754   |
|                                 | 6                           | -0.419802000 | 0.160174000  | -0.000249000                 |                  |                                                                     | 208.5779   | 412.1469  | 578.9108  |
|                                 | 6                           | 0.520603000  | 1.145992000  | -0.000056000                 |                  |                                                                     | 606.8630   | 680.6669  | 753.7894  |
|                                 | 7                           | 1.713965000  | 0.461562000  | 0.000079000                  |                  |                                                                     | 810.3985   | 818.5724  | 859.0613  |
|                                 | 1                           | 2.632798000  | 0.869576000  | 0.000369000                  |                  |                                                                     | 922.4611   | 957.0728  | 1080.9508 |
|                                 | 1                           | 2.189508000  | -1.623775000 | 0.000151000                  |                  |                                                                     | 1134.5876  | 1216.4121 | 1243.1062 |
|                                 | 1                           | -1.657159000 | 0.304400000  | -0.000478000                 |                  |                                                                     | 1357.4743  | 1446.4200 | 1471.5047 |
|                                 | 1                           | 0.459955000  | 2.217534000  | 0.000230000                  |                  |                                                                     | 1530.1095  | 1561.9296 | 3280.1552 |
|                                 | 7                           | 0.131825000  | -1.070664000 | -0.000118000                 |                  |                                                                     | 3317.8269  | 3674.9241 | 3800.4773 |
|                                 | 8                           | -2.860561000 | 0.090168000  | 0.000084000                  |                  |                                                                     |            |           |           |
|                                 | 1                           | -2.825784000 | -0.878712000 | 0.000760000                  |                  |                                                                     |            |           |           |
| <b>TS6</b><br>(C <sub>1</sub> ) | 6                           | 1.563584000  | -0.712586000 | 0.062853000                  | -301.930900      | 0.077390                                                            | -1589.7045 | 83.3313   | 111.3952  |
|                                 | 6                           | 0.544763000  | 1.173974000  | -0.036131000                 |                  |                                                                     | 210.3269   | 372.7757  | 558.3746  |
|                                 | 6                           | -0.404421000 | 0.201713000  | -0.139898000                 |                  |                                                                     | 620.5745   | 686.7543  | 718.3906  |
|                                 | 7                           | 0.241705000  | -0.998499000 | -0.050464000                 |                  |                                                                     | 857.3479   | 872.0428  | 878.3481  |
|                                 | 1                           | -0.190022000 | -1.904638000 | -0.108701000                 |                  |                                                                     | 962.1520   | 1055.5942 | 1101.7819 |
|                                 | 1                           | 2.320140000  | -1.476422000 | 0.126552000                  |                  |                                                                     | 1144.6847  | 1214.3634 | 1267.0049 |
|                                 | 1                           | 0.421942000  | 2.241608000  | -0.052210000                 |                  |                                                                     | 1308.6102  | 1385.7404 | 1440.4486 |
|                                 | 1                           | -1.667061000 | 0.213659000  | -0.276697000                 |                  |                                                                     | 1486.3221  | 1570.9117 | 3274.2525 |
|                                 | 7                           | 1.776901000  | 0.578402000  | 0.072262000                  |                  |                                                                     | 3295.9275  | 3677.7942 | 3815.1624 |
|                                 | 8                           | -2.800388000 | -0.041092000 | -0.010572000                 |                  |                                                                     |            |           |           |
|                                 | 1                           | -2.835694000 | 0.216611000  | 0.922106000                  |                  |                                                                     |            |           |           |
| <b>TS7</b><br>(C <sub>1</sub> ) | 6                           | -0.197366000 | -1.001610000 | -0.197098000                 | -301.935223      | 0.077606                                                            | -2261.3279 | 90.7369   | 105.9675  |
|                                 | 6                           | -1.706282000 | 0.409657000  | 0.242154000                  |                  |                                                                     | 185.2426   | 347.8740  | 612.8233  |
|                                 | 6                           | -0.575621000 | 1.144803000  | -0.093822000                 |                  |                                                                     | 636.4363   | 654.1329  | 808.2431  |
|                                 | 7                           | 0.361371000  | 0.246946000  | -0.431621000                 |                  |                                                                     | 881.7345   | 911.4315  | 923.7563  |
|                                 | 1                           | 1.482080000  | 0.329808000  | -0.380510000                 |                  |                                                                     | 960.4439   | 1026.1820 | 1121.2708 |
|                                 | 1                           | 0.382939000  | -1.899532000 | -0.331440000                 |                  |                                                                     | 1148.0625  | 1213.7311 | 1275.6655 |
|                                 | 1                           | -2.691217000 | 0.781695000  | 0.471282000                  |                  |                                                                     | 1337.8832  | 1402.8617 | 1452.2645 |
|                                 | 1                           | -0.424846000 | 2.206227000  | -0.176864000                 |                  |                                                                     | 1560.8935  | 1734.8663 | 3266.3079 |
|                                 | 7                           | -1.444921000 | -0.932932000 | 0.173310000                  |                  |                                                                     | 3279.3411  | 3298.1830 | 3828.8470 |
|                                 | 8                           | 2.632473000  | -0.025444000 | 0.177584000                  |                  |                                                                     |            |           |           |

| Species                         | Cartesian coordinate<br>(Å) |              |              | $E_{elec}^{0K}$<br>(Hartree) | ZPE<br>(Hartree) | Unscaled vibrational frequencies <sup>[a]</sup> (cm <sup>-1</sup> ) |           |           |           |
|---------------------------------|-----------------------------|--------------|--------------|------------------------------|------------------|---------------------------------------------------------------------|-----------|-----------|-----------|
|                                 | 1                           | 2.651720000  | 0.270158000  | 1.097629000                  |                  |                                                                     |           |           |           |
| <b>PC4</b><br>(C <sub>i</sub> ) | 6                           | -0.582340000 | -1.093682000 | -0.001225000                 | -301.959329      | 0.082766                                                            | 42.3597   | 56.7622   | 78.0465   |
|                                 | 6                           | -1.923953000 | 0.526638000  | 0.001574000                  |                  |                                                                     | 149.5608  | 181.9364  | 244.9384  |
|                                 | 6                           | -0.676209000 | 1.072759000  | -0.000849000                 |                  |                                                                     | 586.1046  | 641.5161  | 764.1581  |
|                                 | 7                           | 0.200350000  | 0.002099000  | -0.002664000                 |                  |                                                                     | 799.7167  | 870.9451  | 890.3774  |
|                                 | 1                           | 1.212291000  | 0.031449000  | -0.004554000                 |                  |                                                                     | 939.7271  | 1093.3462 | 1108.6792 |
|                                 | 1                           | 3.664156000  | -0.239486000 | -0.763128000                 |                  |                                                                     | 1146.1781 | 1228.0821 | 1356.8006 |
|                                 | 1                           | -2.875565000 | 1.028271000  | 0.003528000                  |                  |                                                                     | 1444.1585 | 1533.9258 | 1592.0564 |
|                                 | 1                           | -0.332895000 | 2.091395000  | -0.001482000                 |                  |                                                                     | 1622.1431 | 3279.8676 | 3304.5774 |
|                                 | 7                           | -1.836441000 | -0.859349000 | 0.001293000                  |                  |                                                                     | 3547.3845 | 3863.4074 | 3963.1058 |
|                                 | 8                           | 3.152806000  | 0.036576000  | 0.000989000                  |                  |                                                                     |           |           |           |
| 1                               | 3.657211000                 | -0.237775000 | 0.770327000  |                              |                  |                                                                     |           |           |           |
| <b>PC5</b><br>(C <sub>s</sub> ) | 6                           | 0.686858000  | -1.032677000 | -0.000076000                 | -301.959072      | 0.083048                                                            | 43.6646   | 58.1810   | 137.3328  |
|                                 | 6                           | 1.937721000  | 0.651303000  | 0.000067000                  |                  |                                                                     | 142.5221  | 145.8278  | 228.7655  |
|                                 | 6                           | 0.676960000  | 1.166872000  | 0.000003000                  |                  |                                                                     | 624.5531  | 665.4271  | 760.1268  |
|                                 | 7                           | -0.127722000 | 0.046712000  | -0.000012000                 |                  |                                                                     | 812.8989  | 857.9278  | 879.1136  |
|                                 | 1                           | -1.140523000 | 0.030725000  | -0.000027000                 |                  |                                                                     | 947.3876  | 1075.1154 | 1163.3380 |
|                                 | 1                           | 0.311848000  | -2.042111000 | -0.000134000                 |                  |                                                                     | 1209.3236 | 1263.8730 | 1356.1930 |
|                                 | 1                           | -3.668870000 | -0.047727000 | -0.767292000                 |                  |                                                                     | 1442.7958 | 1504.2178 | 1541.5048 |
|                                 | 1                           | 0.286354000  | 2.166051000  | 0.000011000                  |                  |                                                                     | 1621.2896 | 3275.9446 | 3317.8384 |
|                                 | 7                           | 1.957717000  | -0.681217000 | 0.000033000                  |                  |                                                                     | 3548.7846 | 3864.8424 | 3965.0024 |
|                                 | 8                           | -3.092394000 | -0.041329000 | 0.000003000                  |                  |                                                                     |           |           |           |
| 1                               | -3.668854000                | -0.047761000 | 0.767309000  |                              |                  |                                                                     |           |           |           |
| <b>PC6</b><br>(C <sub>i</sub> ) | 6                           | -0.629964000 | 1.037681000  | -0.001591000                 | -301.953756      | 0.082836                                                            | 44.9081   | 56.5485   | 98.0804   |
|                                 | 6                           | -1.904829000 | -0.694209000 | 0.002938000                  |                  |                                                                     | 138.9606  | 152.8567  | 233.5057  |
|                                 | 6                           | -0.616808000 | -1.123982000 | -0.003595000                 |                  |                                                                     | 554.4090  | 679.3421  | 793.6191  |
|                                 | 7                           | 0.201540000  | -0.040486000 | -0.006515000                 |                  |                                                                     | 845.0572  | 853.3894  | 882.9284  |
|                                 | 1                           | 1.214672000  | -0.037114000 | -0.011120000                 |                  |                                                                     | 943.0478  | 1097.2204 | 1142.6404 |
|                                 | 1                           | -0.260973000 | 2.049622000  | -0.002400000                 |                  |                                                                     | 1188.2680 | 1261.6681 | 1353.5955 |
|                                 | 1                           | -2.816945000 | -1.261325000 | 0.006815000                  |                  |                                                                     | 1446.6211 | 1470.6095 | 1559.4244 |
|                                 | 1                           | 3.684348000  | -0.215693000 | 0.775404000                  |                  |                                                                     | 1622.2287 | 3272.2166 | 3303.9497 |
|                                 | 7                           | -1.889632000 | 0.684175000  | 0.004138000                  |                  |                                                                     | 3537.1977 | 3864.1841 | 3964.2768 |
|                                 | 8                           | 3.150199000  | -0.018926000 | 0.002540000                  |                  |                                                                     |           |           |           |
| 1                               | 3.703554000                 | -0.206838000 | -0.758892000 |                              |                  |                                                                     |           |           |           |

| Species                         | Cartesian coordinate<br>(Å) |              |              | $E_{elec}^{0K}$<br>(Hartree) | ZPE<br>(Hartree) | Unscaled vibrational frequencies <sup>[a]</sup> (cm <sup>-1</sup> ) |           |           |           |
|---------------------------------|-----------------------------|--------------|--------------|------------------------------|------------------|---------------------------------------------------------------------|-----------|-----------|-----------|
| <b>PC7</b><br>(C <sub>1</sub> ) | 6                           | -0.027081000 | -0.730713000 | 0.003925000                  | -301.987121      | 0.081879                                                            | 46.3109   | 68.6134   | 87.9763   |
|                                 | 6                           | -1.981401000 | 0.030699000  | -0.002303000                 |                  |                                                                     | 163.9926  | 390.6920  | 489.0203  |
|                                 | 6                           | -1.011444000 | 1.128472000  | -0.000524000                 |                  |                                                                     | 549.6262  | 571.9272  | 785.5072  |
|                                 | 7                           | 0.195680000  | 0.619325000  | 0.003147000                  |                  |                                                                     | 802.1307  | 923.1850  | 926.2919  |
|                                 | 1                           | 2.217128000  | 0.516518000  | -0.002027000                 |                  |                                                                     | 928.8760  | 1012.6109 | 1034.4694 |
|                                 | 1                           | 0.791686000  | -1.434095000 | 0.006725000                  |                  |                                                                     | 1190.9561 | 1201.3379 | 1306.2714 |
|                                 | 1                           | -3.058730000 | 0.099827000  | -0.005376000                 |                  |                                                                     | 1333.3736 | 1483.1882 | 1564.5091 |
|                                 | 1                           | -1.205707000 | 2.190248000  | -0.002082000                 |                  |                                                                     | 1632.0989 | 3238.5971 | 3251.2559 |
|                                 | 7                           | -1.336018000 | -1.109268000 | 0.000490000                  |                  |                                                                     | 3262.3749 | 3747.2810 | 3948.0648 |
|                                 | 8                           | 2.950349000  | -0.114551000 | -0.009406000                 |                  |                                                                     |           |           |           |
| 1                               | 3.754753000                 | 0.402752000  | 0.045963000  |                              |                  |                                                                     |           |           |           |
| <b>P4</b><br>(C <sub>s</sub> )  | 6                           | -0.081162000 | -1.154515000 | -0.00004000                  | -225.519193      | 0.059146                                                            | 504.4893  | 628.3427  | 640.5182  |
|                                 | 6                           | 0.843656000  | 0.738359000  | 0.000029000                  |                  |                                                                     | 762.5651  | 863.2769  | 891.3957  |
|                                 | 6                           | -0.494556000 | 0.983255000  | -0.000033000                 |                  |                                                                     | 941.8152  | 1077.3892 | 1103.5223 |
|                                 | 7                           | -1.095792000 | -0.265330000 | 0.000022000                  |                  |                                                                     | 1140.8324 | 1209.3039 | 1355.5777 |
|                                 | 1                           | -2.078562000 | -0.468871000 | 0.000021000                  |                  |                                                                     | 1418.5640 | 1537.0357 | 1598.7132 |
|                                 | 1                           | 1.653363000  | 1.446256000  | 0.000043000                  |                  |                                                                     | 3282.4013 | 3307.5479 | 3698.9384 |
|                                 | 1                           | -1.065058000 | 1.894079000  | -0.000035000                 |                  |                                                                     |           |           |           |
|                                 | 7                           | 1.079025000  | -0.630964000 | -0.000019000                 |                  |                                                                     |           |           |           |
| <b>P5</b><br>(C <sub>s</sub> )  | 6                           | -0.821106000 | 0.691955000  | -0.000176000                 | -225.519074      | 0.059427                                                            | 579.2094  | 626.7556  | 686.1431  |
|                                 | 6                           | 0.090039000  | -1.199738000 | 0.000105000                  |                  |                                                                     | 755.4364  | 849.7343  | 873.5978  |
|                                 | 6                           | 1.135751000  | -0.329742000 | 0.000222000                  |                  |                                                                     | 949.5478  | 1069.6258 | 1127.6826 |
|                                 | 7                           | 0.517136000  | 0.905244000  | 0.000032000                  |                  |                                                                     | 1205.9998 | 1262.1517 | 1361.5550 |
|                                 | 1                           | 0.973649000  | 1.801180000  | 0.000105000                  |                  |                                                                     | 1432.4571 | 1498.4453 | 1535.4125 |
|                                 | 1                           | -1.538086000 | 1.495287000  | -0.000354000                 |                  |                                                                     | 3278.5293 | 3320.5552 | 3672.5255 |
|                                 | 1                           | 2.201679000  | -0.450284000 | 0.000412000                  |                  |                                                                     |           |           |           |
|                                 | 7                           | -1.097900000 | -0.593963000 | -0.000186000                 |                  |                                                                     |           |           |           |
| <b>P6</b><br>(C <sub>s</sub> )  | 6                           | -0.696953000 | 0.810621000  | -0.000140000                 | -225.513504      | 0.059251                                                            | 499.2536  | 593.1680  | 684.6197  |
|                                 | 6                           | 1.178666000  | -0.247502000 | 0.000143000                  |                  |                                                                     | 838.1425  | 855.4684  | 875.9973  |
|                                 | 6                           | 0.186435000  | -1.171750000 | 0.000121000                  |                  |                                                                     | 944.4563  | 1085.3405 | 1122.2526 |
|                                 | 7                           | -1.006154000 | -0.517856000 | -0.000061000                 |                  |                                                                     | 1179.0030 | 1258.2986 | 1355.3255 |
|                                 | 1                           | -1.921229000 | -0.932194000 | -0.000239000                 |                  |                                                                     | 1422.4844 | 1470.6671 | 1559.8973 |
|                                 | 1                           | -1.450040000 | 1.580526000  | -0.000273000                 |                  |                                                                     | 3275.3040 | 3304.2602 | 3684.0864 |
|                                 | 1                           | 2.243602000  | -0.386001000 | 0.000283000                  |                  |                                                                     |           |           |           |

| Species                        | Cartesian coordinate (Å) |              |              |              | $E_{elec}^{0K}$ (Hartree) | ZPE (Hartree) | Unscaled vibrational frequencies <sup>[a]</sup> (cm <sup>-1</sup> ) |           |           |
|--------------------------------|--------------------------|--------------|--------------|--------------|---------------------------|---------------|---------------------------------------------------------------------|-----------|-----------|
|                                | 7                        | 0.594551000  | 1.002064000  | -0.000013000 |                           |               |                                                                     |           |           |
| <b>P7</b><br>(C <sub>s</sub> ) | 6                        | -0.002570000 | -1.091399000 | 0.000025000  | -225.547068               | 0.057567      | 531.7446                                                            | 570.9612  | 772.0446  |
|                                | 6                        | 0.735522000  | 0.868602000  | 0.000027000  |                           |               | 797.4632                                                            | 910.3987  | 923.3898  |
|                                | 6                        | -0.731416000 | 0.872030000  | -0.000019000 |                           |               | 925.3158                                                            | 1007.5195 | 1028.8139 |
|                                | 7                        | -1.158602000 | -0.366453000 | 0.000003000  |                           |               | 1190.9896                                                           | 1199.6502 | 1299.6417 |
|                                | 1                        | -0.005138000 | -2.170191000 | -0.000008000 |                           |               | 1331.0873                                                           | 1478.0055 | 1560.9905 |
|                                | 1                        | 1.401818000  | 1.718161000  | 0.000035000  |                           |               | 3234.7830                                                           | 3247.3260 | 3258.8921 |
|                                | 1                        | -1.393915000 | 1.724527000  | -0.000020000 |                           |               |                                                                     |           |           |
|                                | 7                        | 1.156891000  | -0.371816000 | -0.000032000 |                           |               |                                                                     |           |           |

Frequencies in the parentheses (“( )”) are taken from experimental studies.

**Table S2:** Calculated overall rate constants,  $k_{tot}$ , of the imidazole + OH → products over the range of temperature 297 – 440 K at different pressures, including the HIR treatments, Eckart quantum tunneling effects. Units are in cm<sup>3</sup>/molecule/s.

| T (K) | 0.75 torr | 7.5 torr | 100 torr | 750 torr | 760 torr | 7500 torr | 75000 torr | 750000 torr |
|-------|-----------|----------|----------|----------|----------|-----------|------------|-------------|
| 297   | 1.80E-11  | 3.04E-11 | 3.44E-11 | 3.79E-11 | 3.80E-11 | 6.06E-11  | 1.67E-10   | 3.42E-10    |
| 316   | 1.51E-11  | 2.75E-11 | 3.16E-11 | 3.43E-11 | 3.45E-11 | 5.06E-11  | 1.32E-10   | 3.20E-10    |
| 331   | 1.27E-11  | 2.46E-11 | 2.88E-11 | 3.17E-11 | 3.16E-11 | 4.54E-11  | 1.06E-10   | 2.96E-10    |
| 344   | 1.14E-11  | 2.25E-11 | 2.69E-11 | 2.93E-11 | 2.91E-11 | 4.06E-11  | 8.63E-11   | 2.69E-10    |
| 352   | 1.03E-11  | 2.13E-11 | 2.56E-11 | 2.77E-11 | 2.76E-11 | 3.81E-11  | 7.60E-11   | 2.50E-10    |
| 362   | 9.29E-12  | 1.94E-11 | 2.44E-11 | 2.58E-11 | 2.57E-11 | 3.47E-11  | 6.47E-11   | 2.26E-10    |
| 386   | 6.97E-12  | 1.60E-11 | 2.10E-11 | 2.26E-11 | 2.26E-11 | 2.83E-11  | 4.65E-11   | 1.66E-10    |
| 402   | 5.95E-12  | 1.41E-11 | 1.89E-11 | 1.99E-11 | 1.98E-11 | 2.46E-11  | 3.81E-11   | 1.30E-10    |
| 425   | 4.42E-12  | 1.13E-11 | 1.56E-11 | 1.68E-11 | 1.69E-11 | 2.01E-11  | 2.95E-11   | 8.48E-11    |
| 440   | 3.69E-12  | 9.46E-12 | 1.36E-11 | 1.47E-11 | 1.46E-11 | 1.80E-11  | 2.49E-11   | 6.30E-11    |

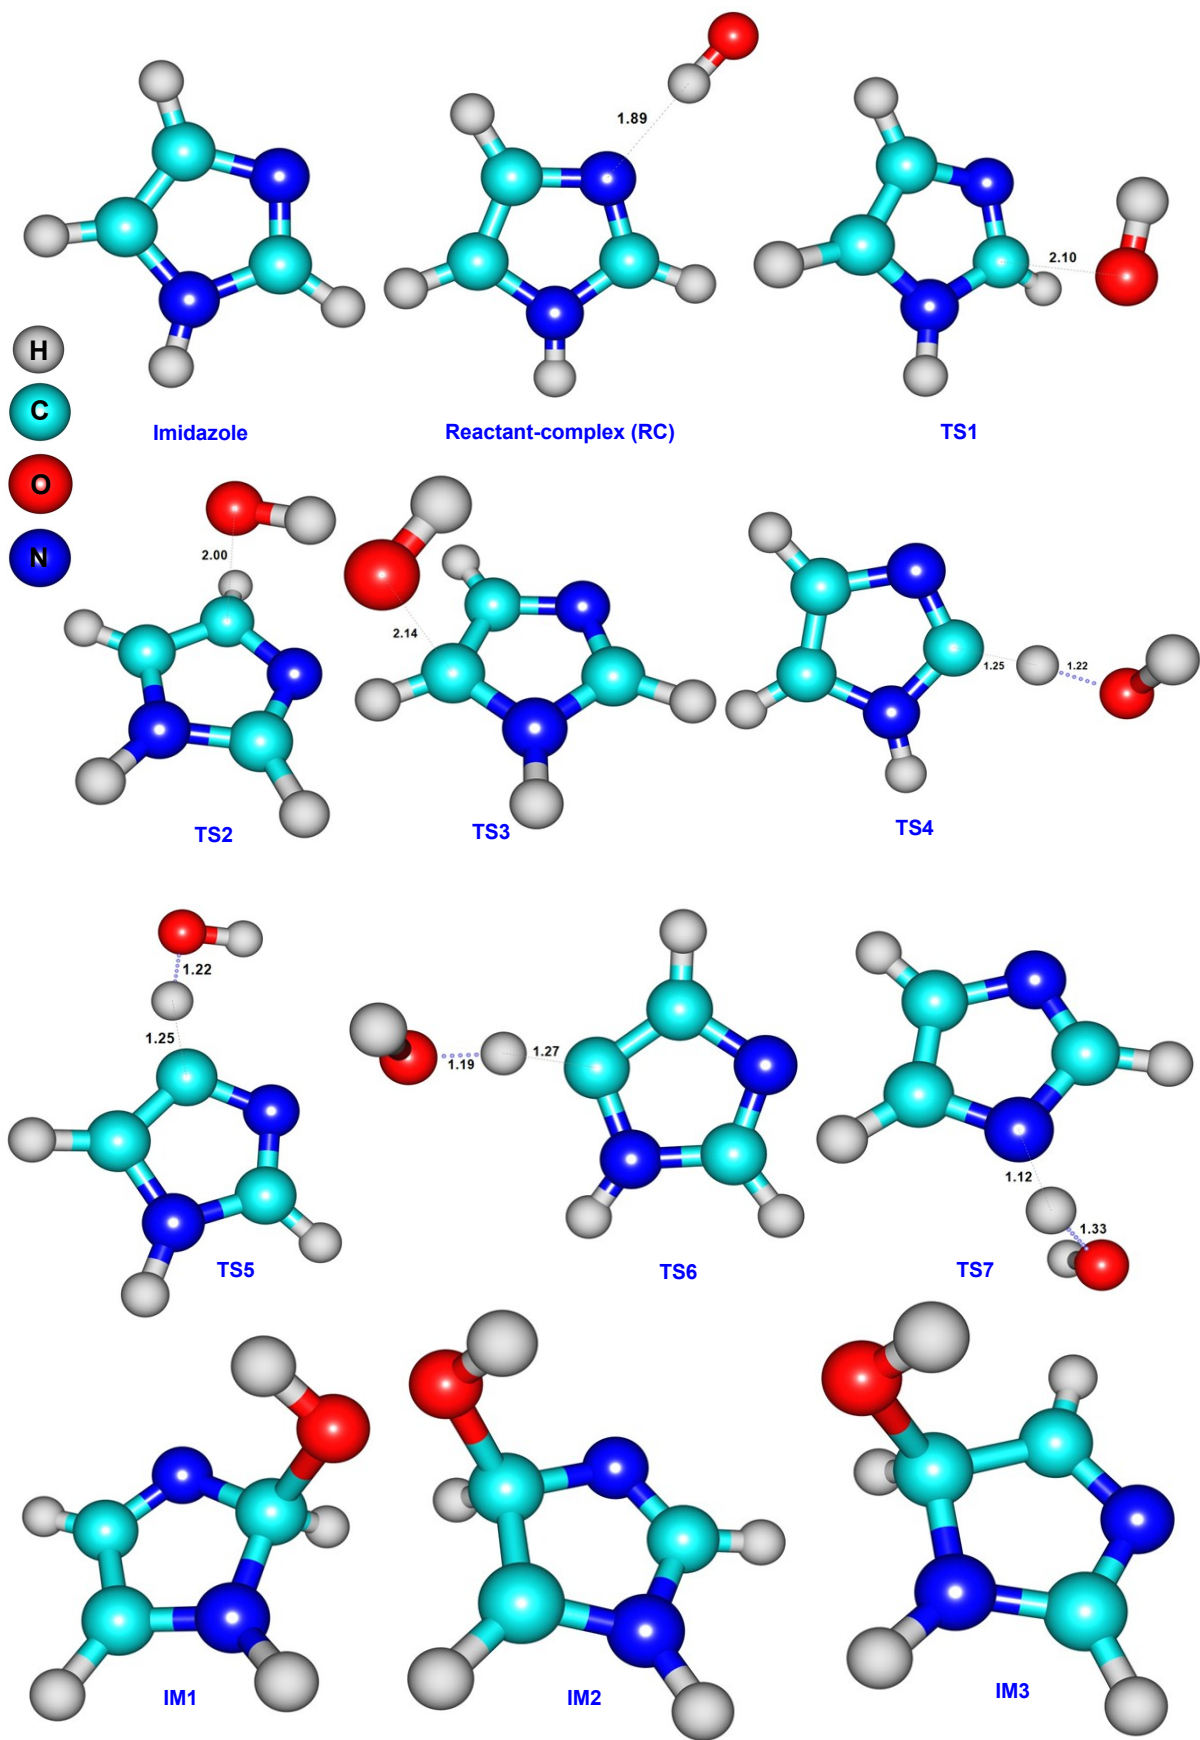

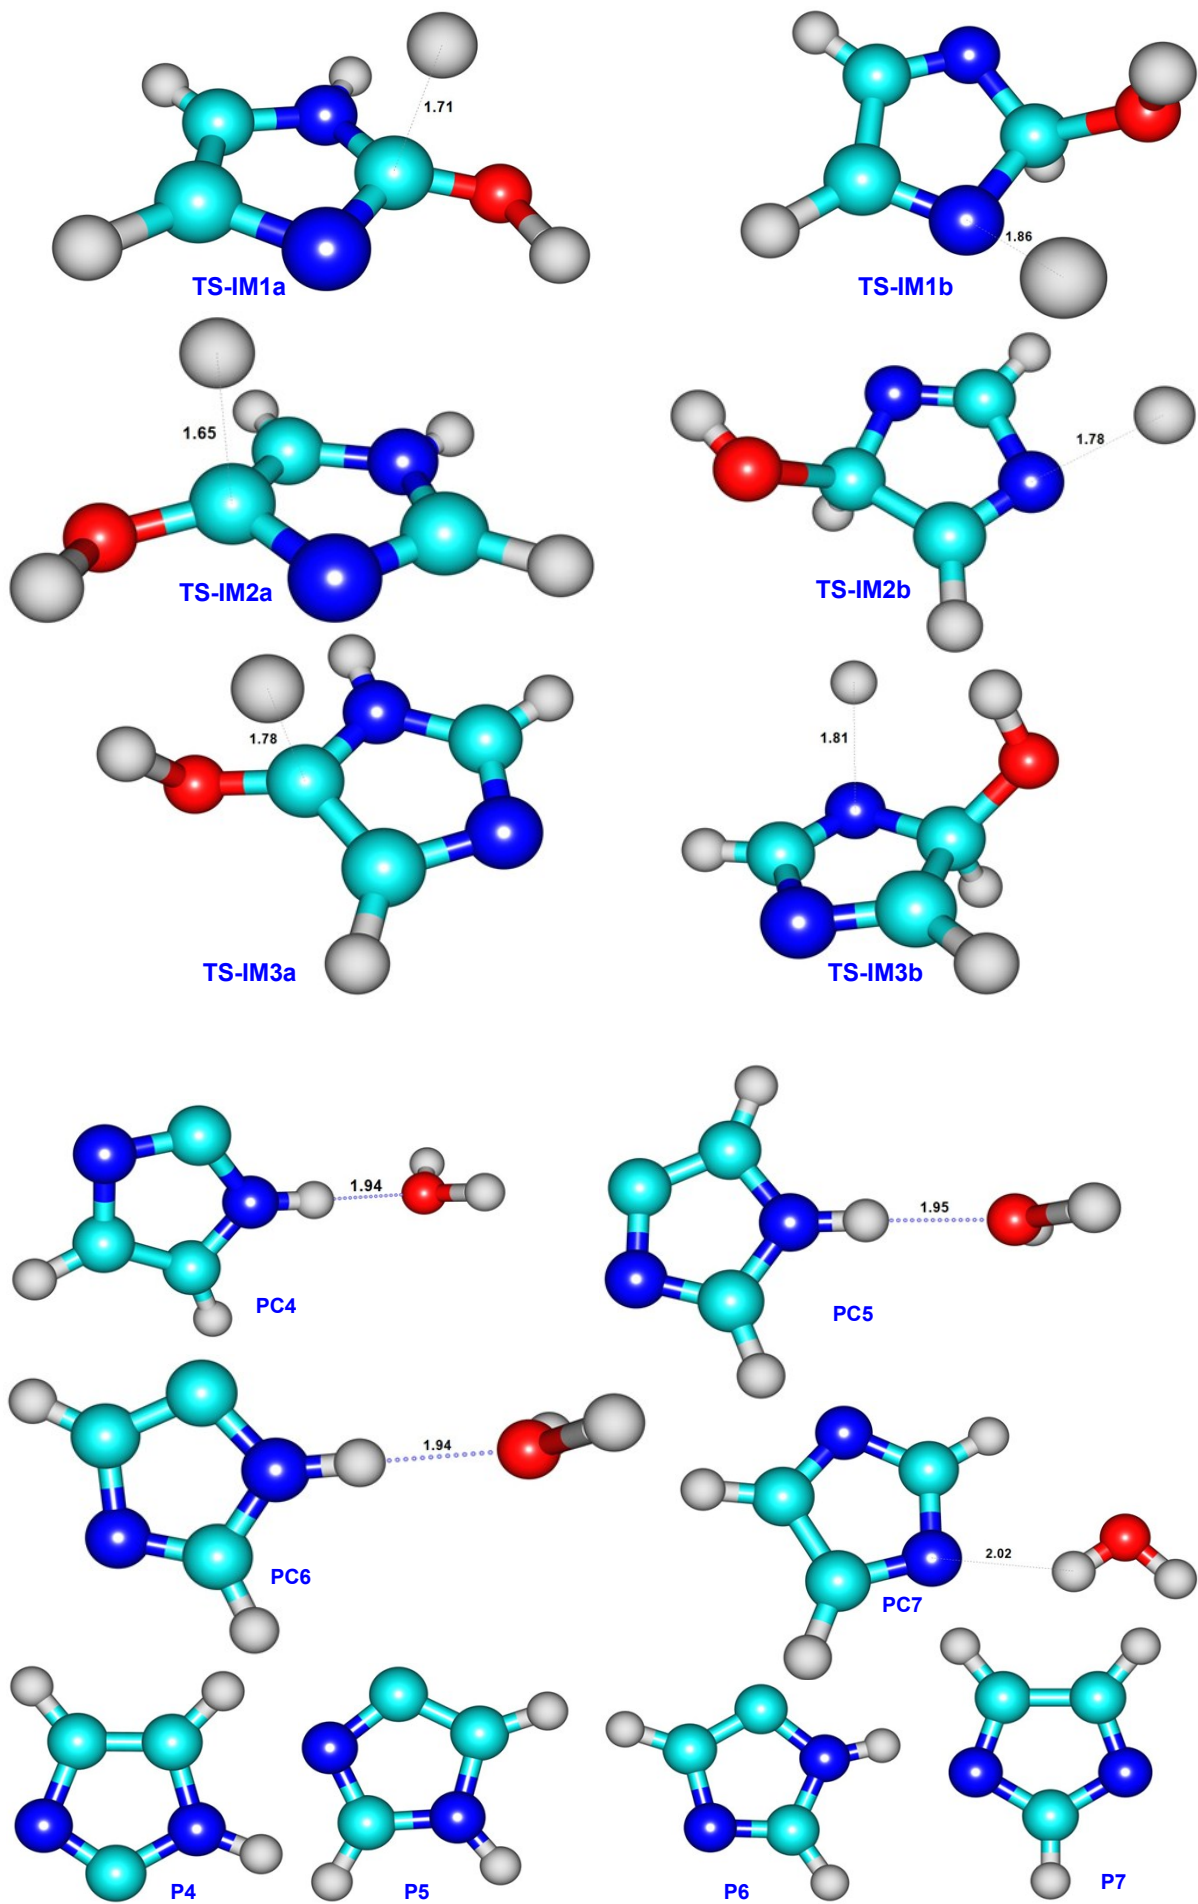

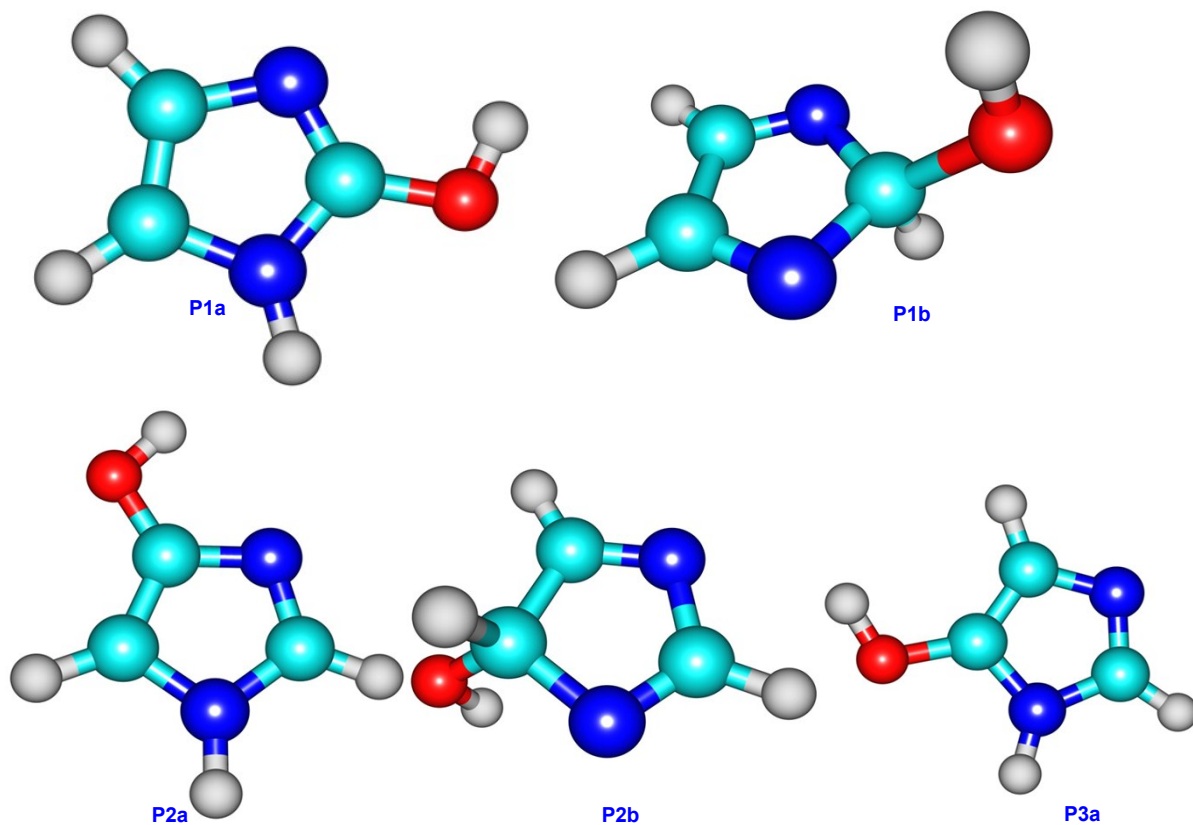

**Figure S1:** M06-2X/aug-cc-pVTZ optimized geometries for the species involved in the imidazole + OH reaction. All structures were obtained for the lowest-energy conformer of a given species. Bond lengths are in Å.

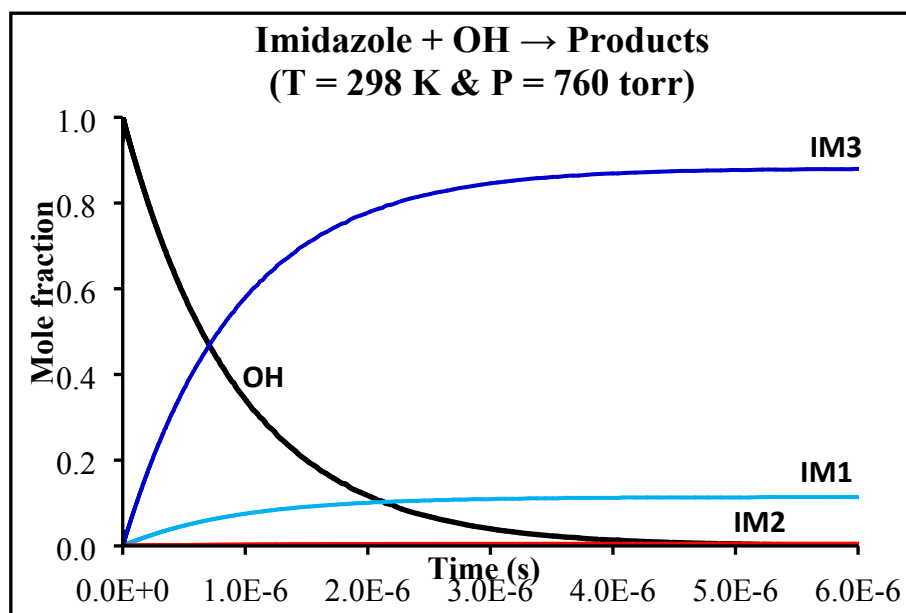

**Figure S2:** Time-resolved species profiles for the imidazole + OH reaction, simulated at the atmospheric condition using the stochastic (with  $10^6$  numbers of trials) approach with  $[\text{imidazole}]/[\text{Ar}] = 10^{-3}$  and  $[\text{imidazole}]_0 \gg [\text{OH}]_0$  (Ar is the bath gas). The calculations were carried out using the simplified PES in Figure 1 (main text).



| Species | Potential energy surfaces for the internal rotations |
|---------|------------------------------------------------------|
|---------|------------------------------------------------------|

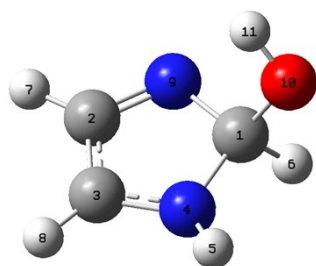

**IM1**

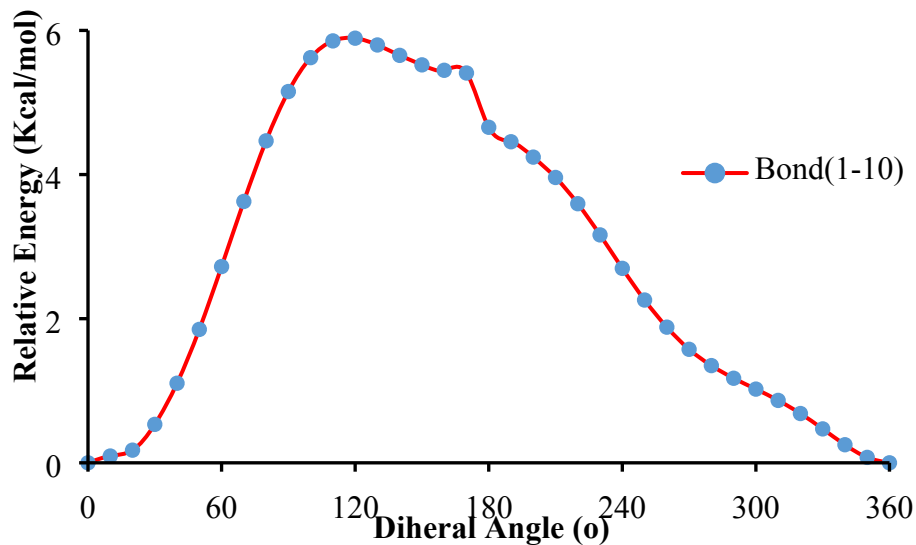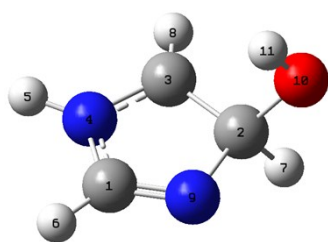

**IM2**

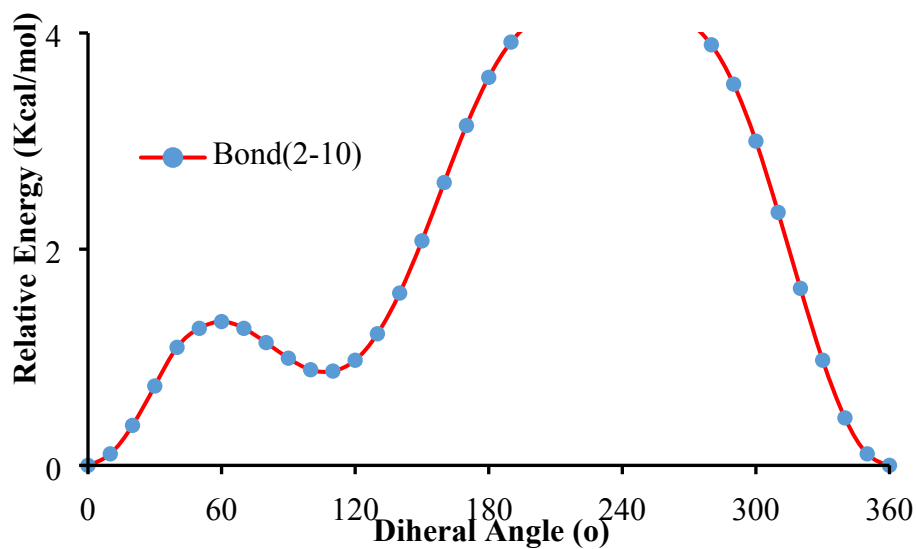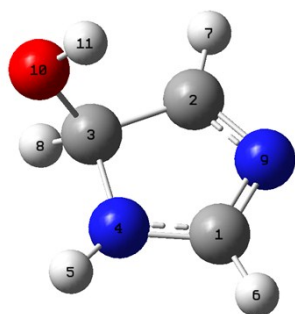

**IM3**

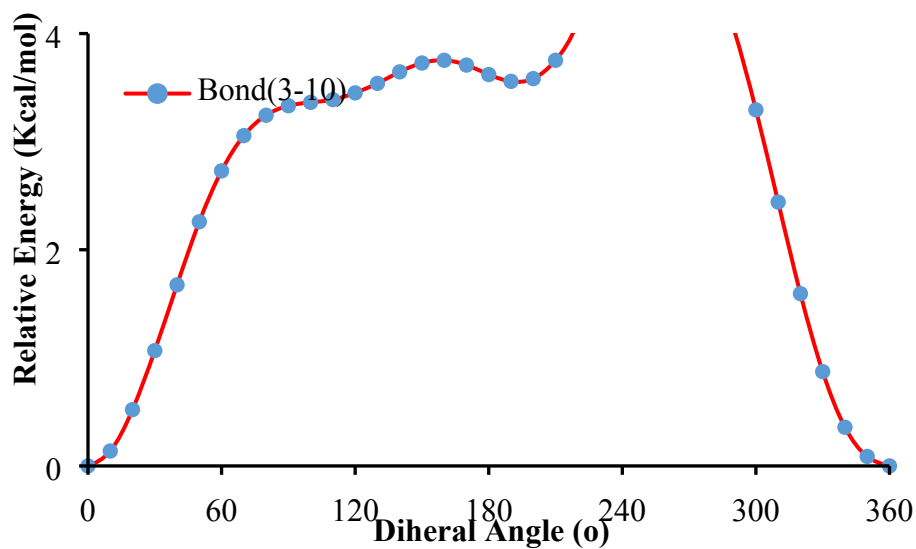

## Species

## Potential energy surfaces for the internal rotations

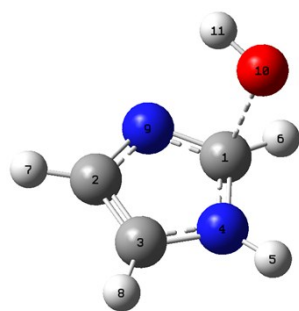

TS1

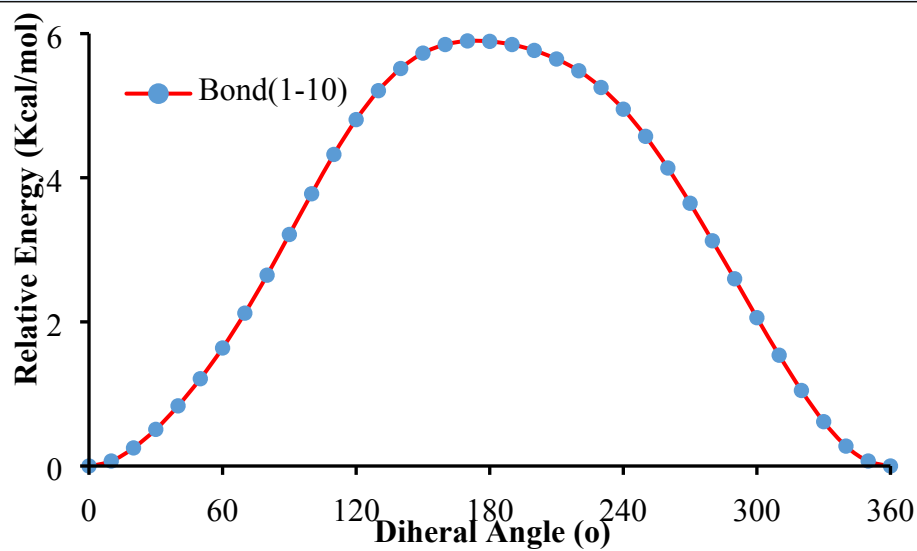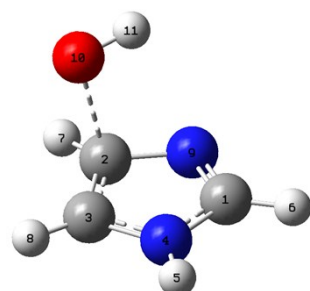

TS2

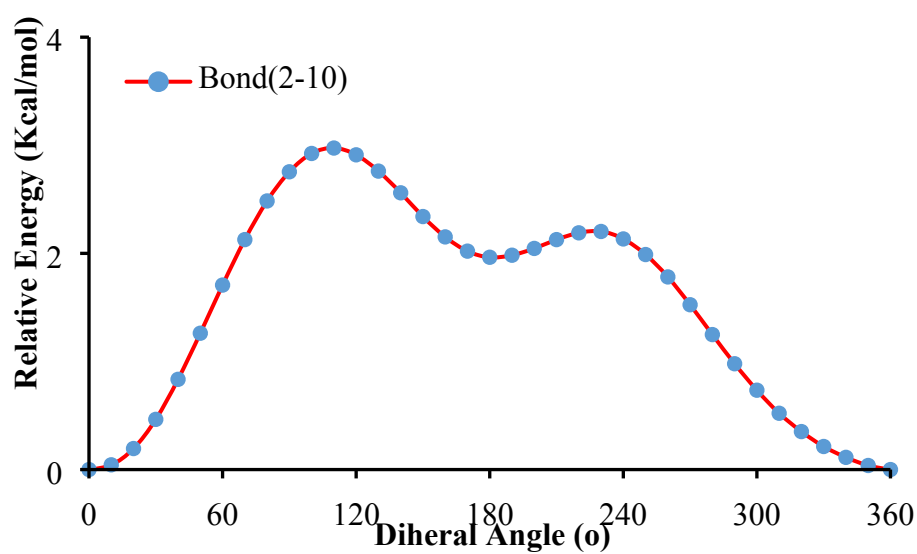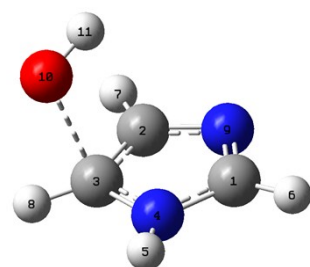

TS3

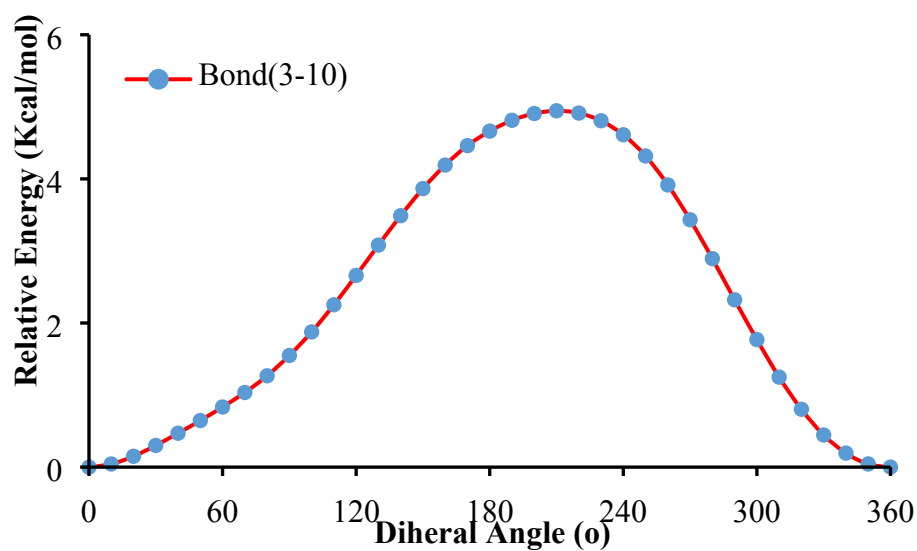

## Species

## Potential energy surfaces for the internal rotations

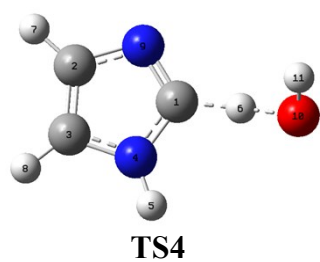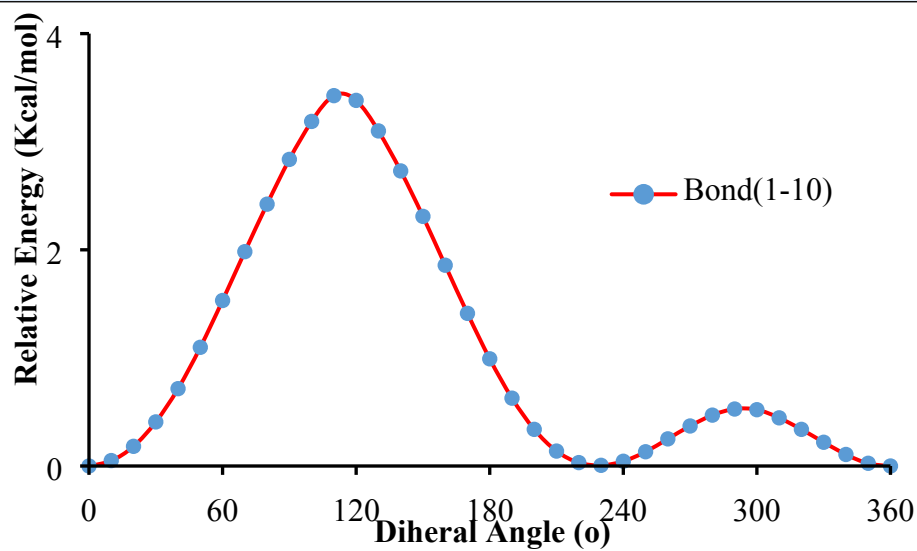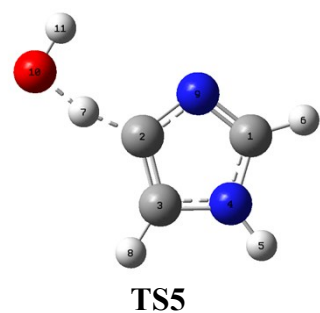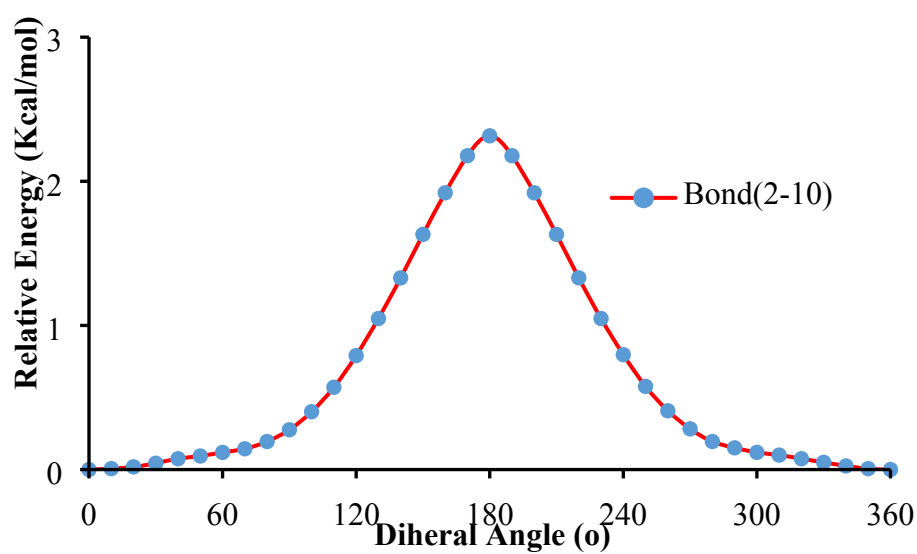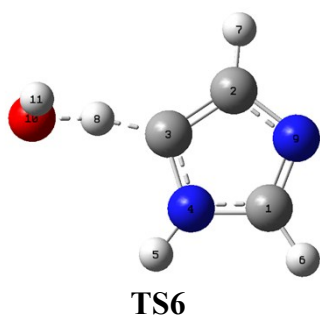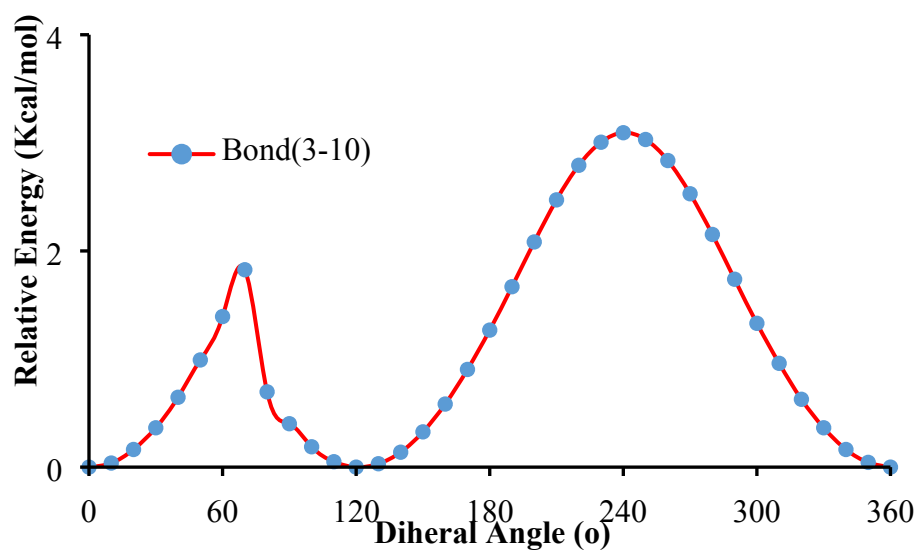

## Species

## Potential energy surfaces for the internal rotations

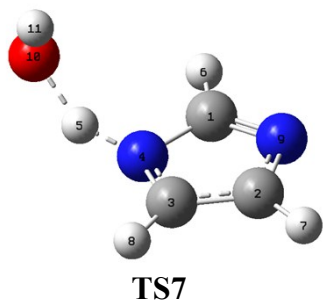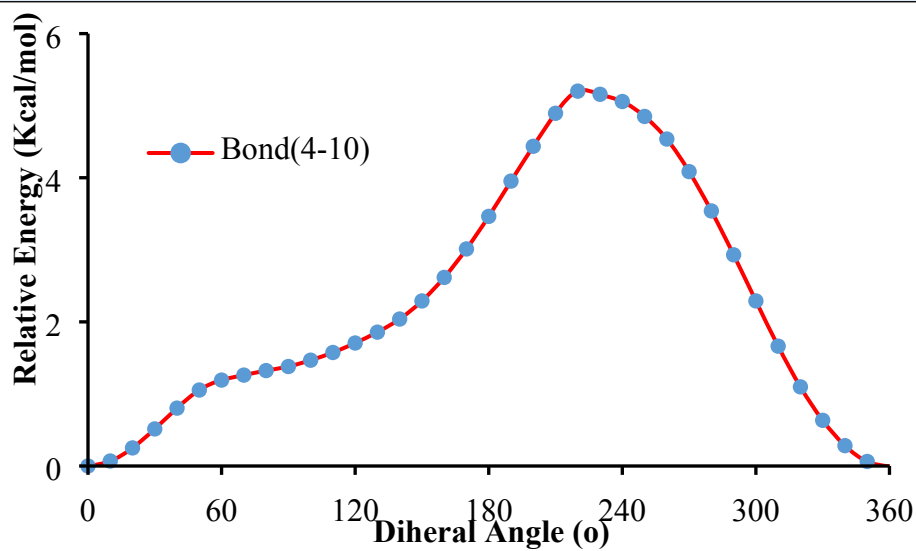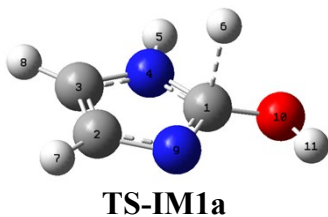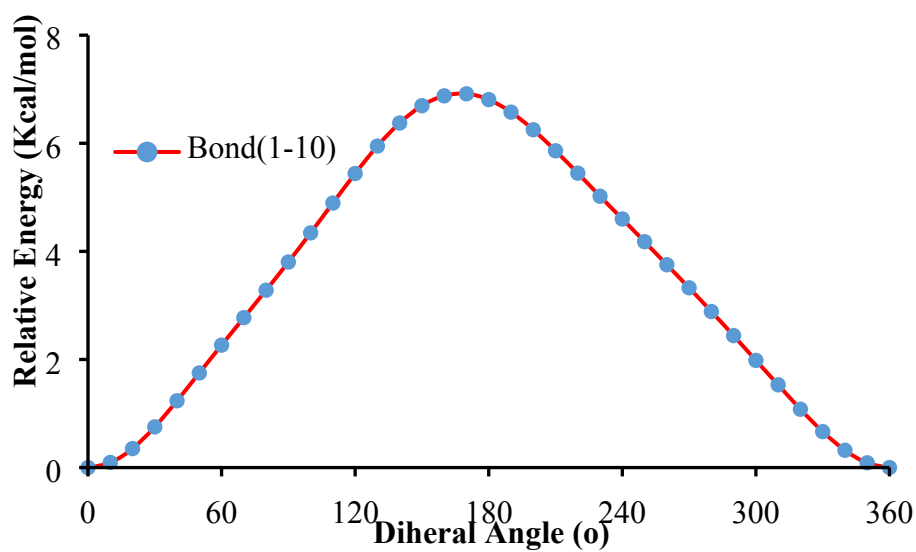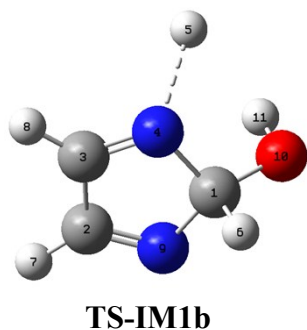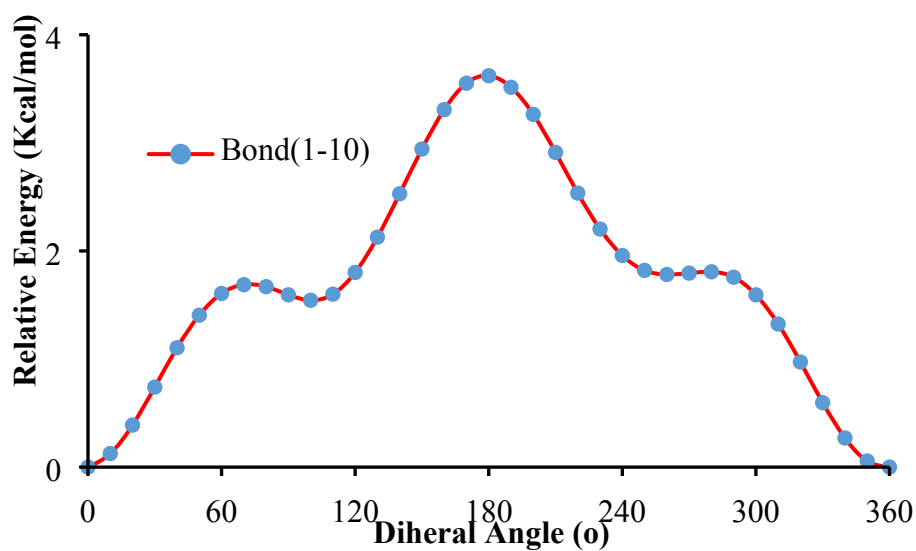

## Species

## Potential energy surfaces for the internal rotations

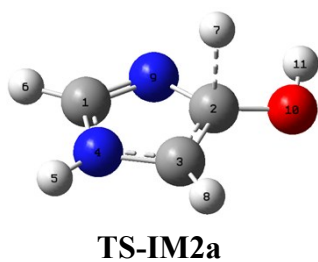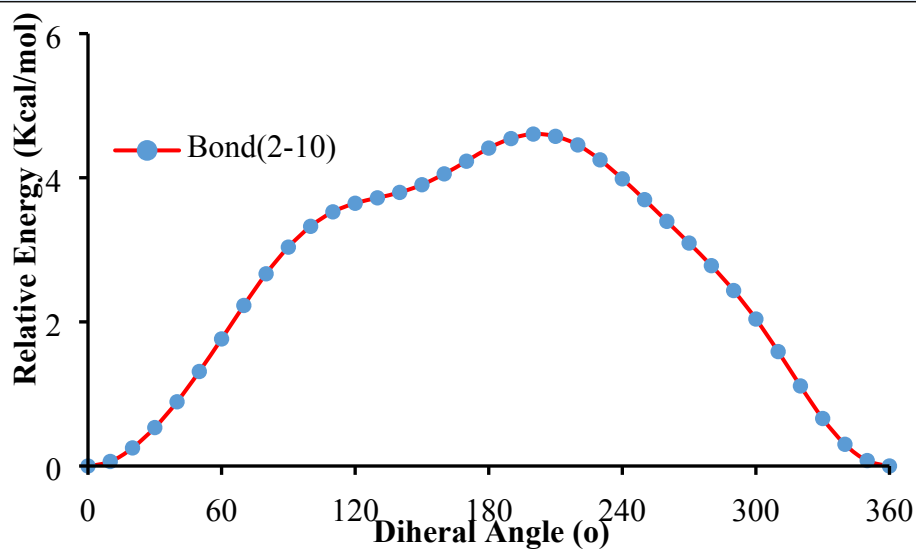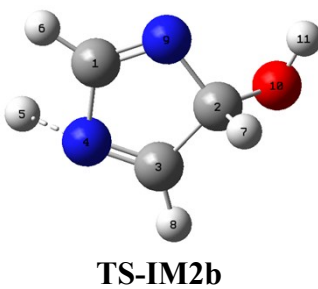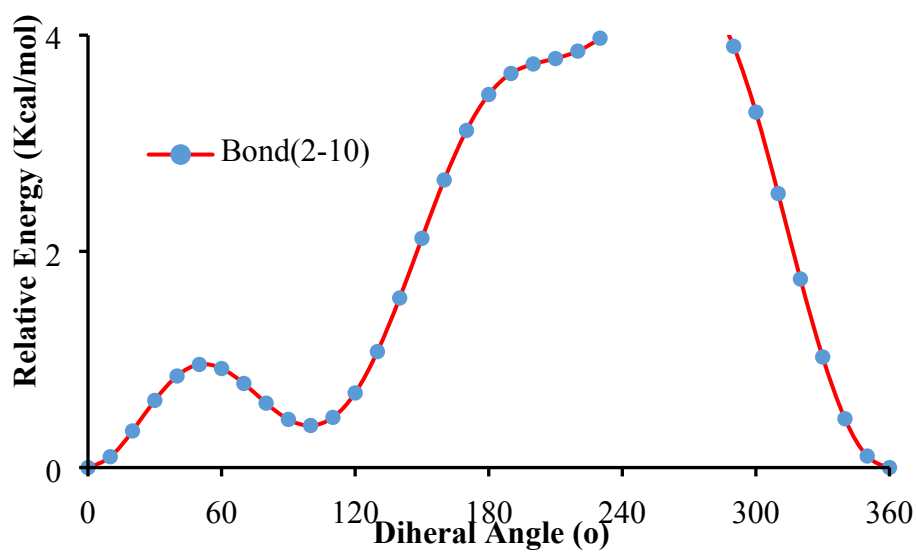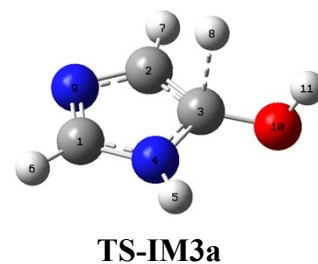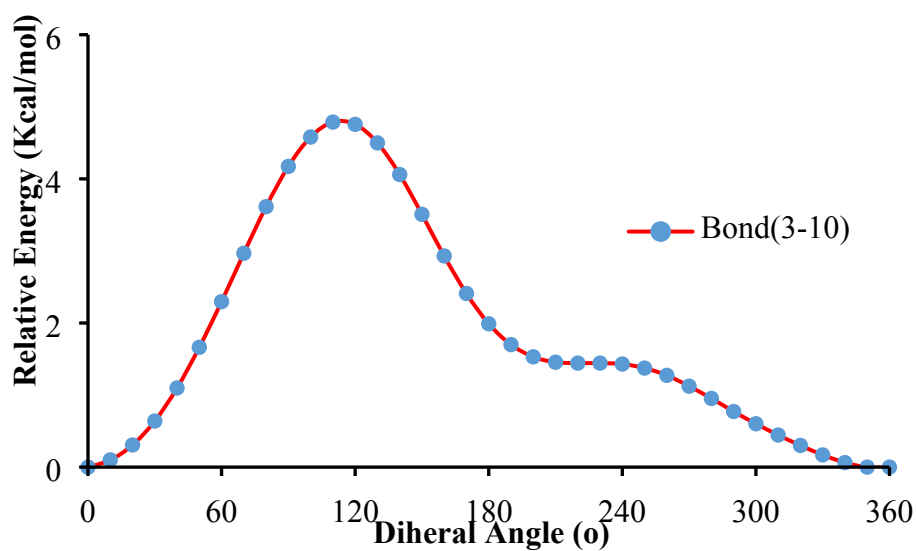

## Species

## Potential energy surfaces for the internal rotations

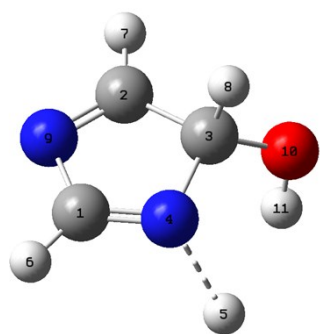

TS-IM3b

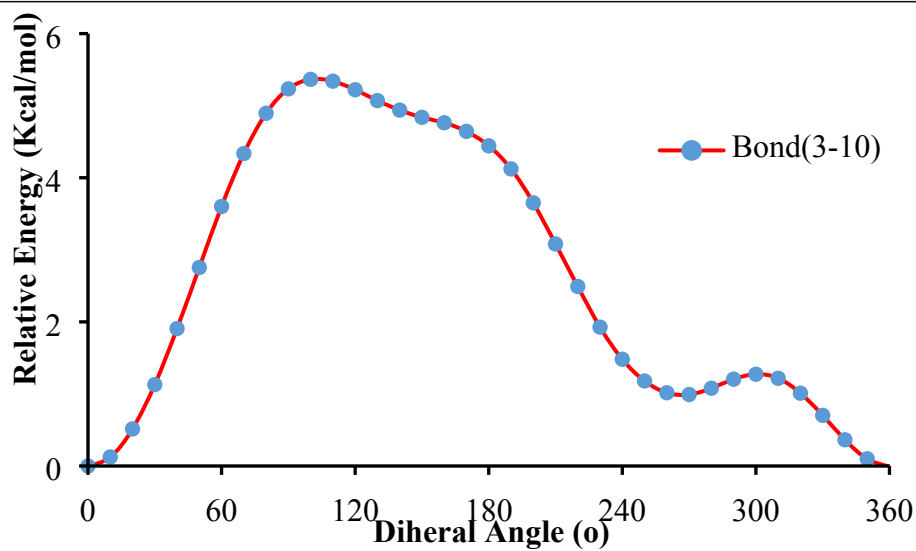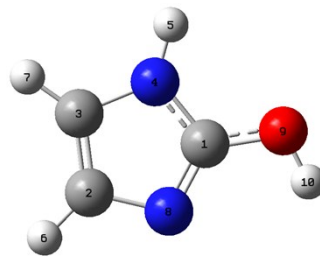

P-IM1a

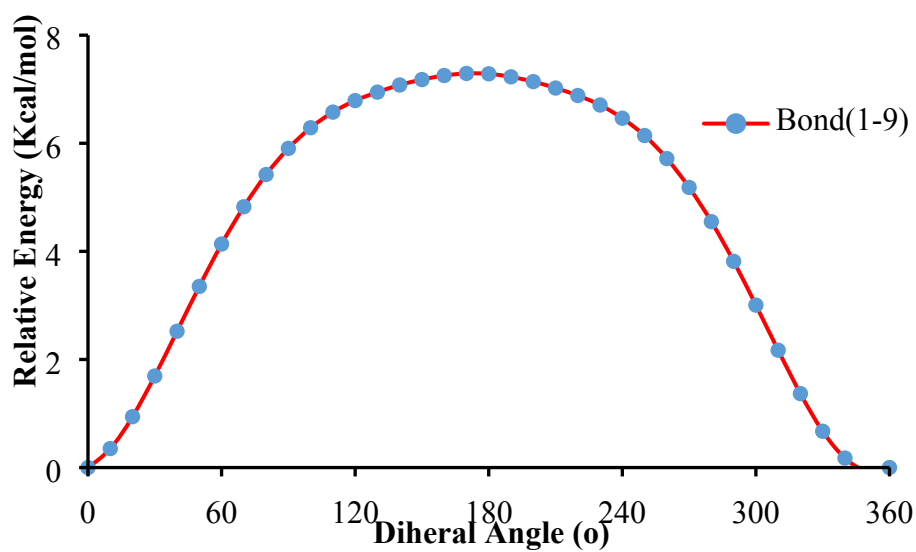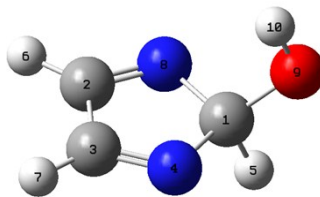

P-IM1b

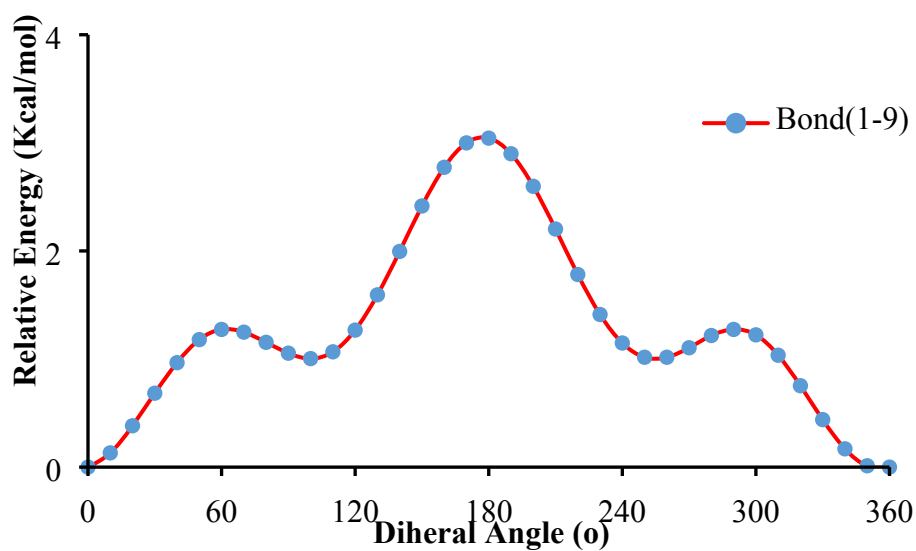

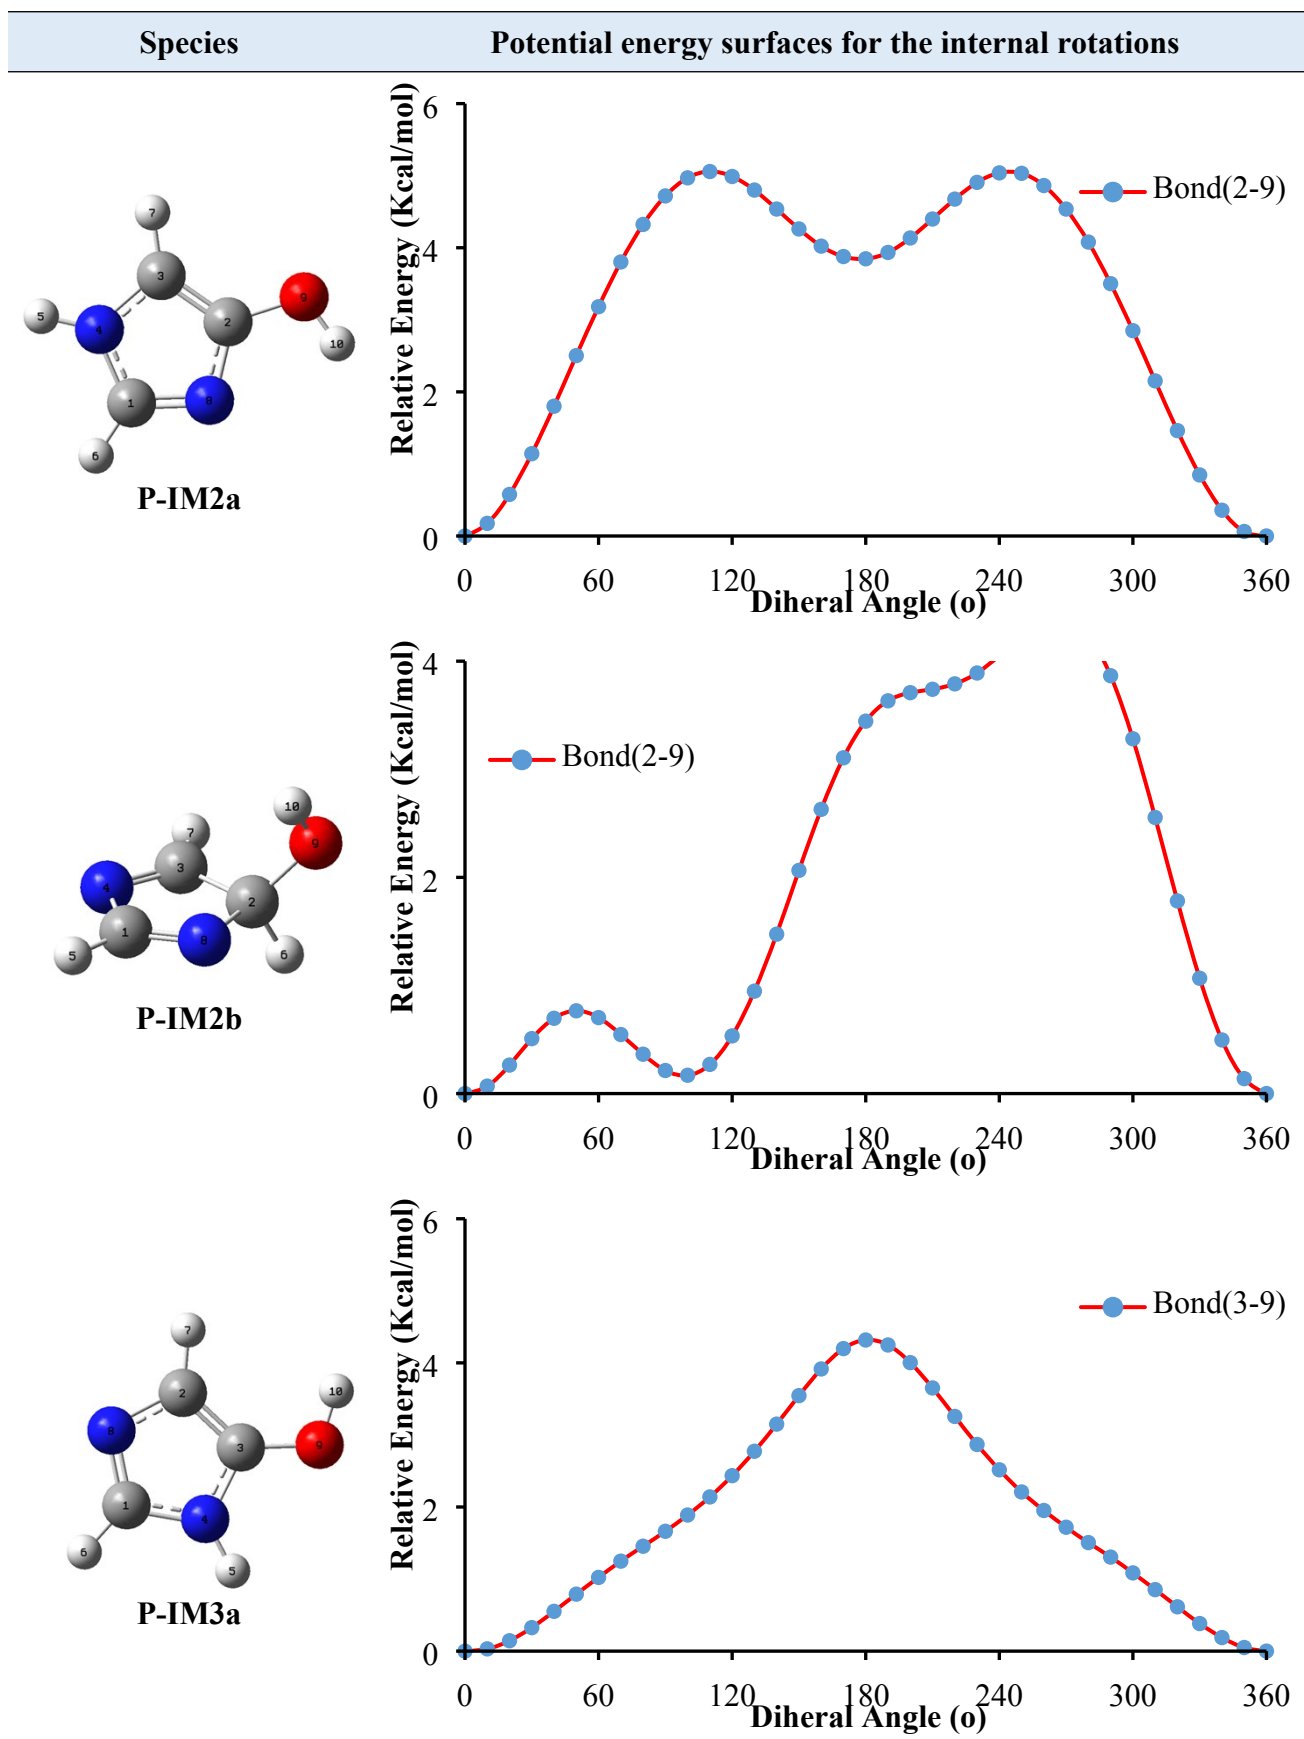

**Figure S3:** Hindrance potentials for the species involved in the imidazole + OH reaction, calculated at M06-2X/cc-pVDZ level of theory.

**References:**

- [1] K.P. Huber, G. Herzberg, *Molecular Spectra and Molecular Structure. IV. Constants of Diatomic Molecules*, Van Nostrand Reinhold Co, 1979.
- [2] T. Shimanouchi, *Tables of Molecular Vibrational Frequencies, Consolidated Volume 1*, NSRDS NBS-39.
- [3] F. Billes, H. Endrédi, G. Jalsovszky, *Journal of Molecular Structure: THEOCHEM* 465 (1999) 157.
